# Supplementary material for: Synthesis and Properties of New 3-Heterylamino-Substituted 9-Nitrobenzanthrone Derivatives
Source: MDPI journal article supplement (doi:10.3390/molecules28135171), 2023-07-02
Supplement: s1 [file s1]

# Synthesis and Properties of New 3-Heterylamino-Substituted 9-Nitrobenzanthrone Derivatives

Armands Maļeckis <sup>1</sup>, Marija Cvetinska <sup>1</sup>, Aleksandrs Puckins <sup>2</sup>, Sergejs Osipovs <sup>2</sup>, Jelizaveta Sirokova <sup>2</sup>, Sergey Belyakov <sup>3</sup> and Elena Kirilova <sup>2,\*</sup>

<sup>1</sup> Institute of Technology of Organic Chemistry, Faculty of Materials Science and Applied Chemistry, Riga Technical University, P. Valdena Str. 3, LV-1048 Riga, Latvia

<sup>2</sup> Department of Applied Chemistry, Institute of Life Sciences and Technology, Daugavpils University, LV-5401 Daugavpils, Latvia

<sup>3</sup> Latvian Institute of Organic Synthesis, Aizkraukles Str. 21, LV-1006 Riga, Latvia; serg@osi.lv

\* Correspondence: jelena.kirilova@du.lv

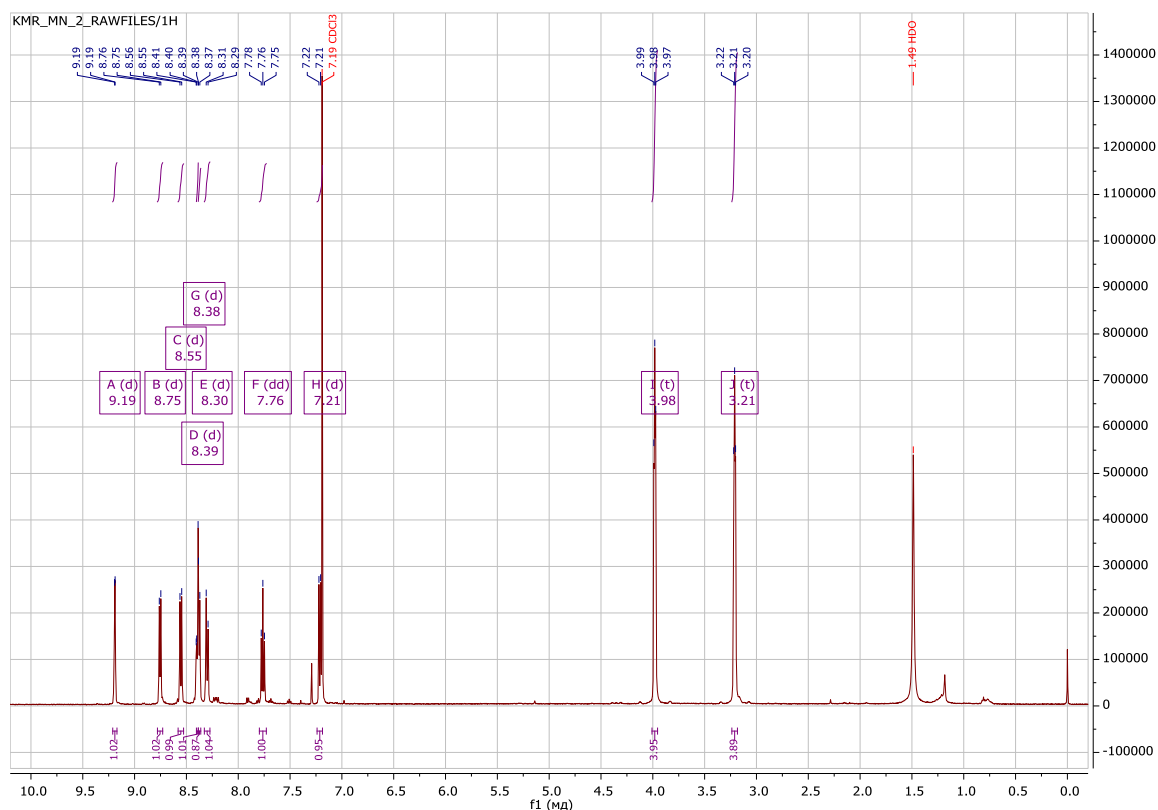

**Figure S1.** <sup>1</sup>H-NMR (500 MHz, CDCl<sub>3</sub>) spectrum of compound **2**.

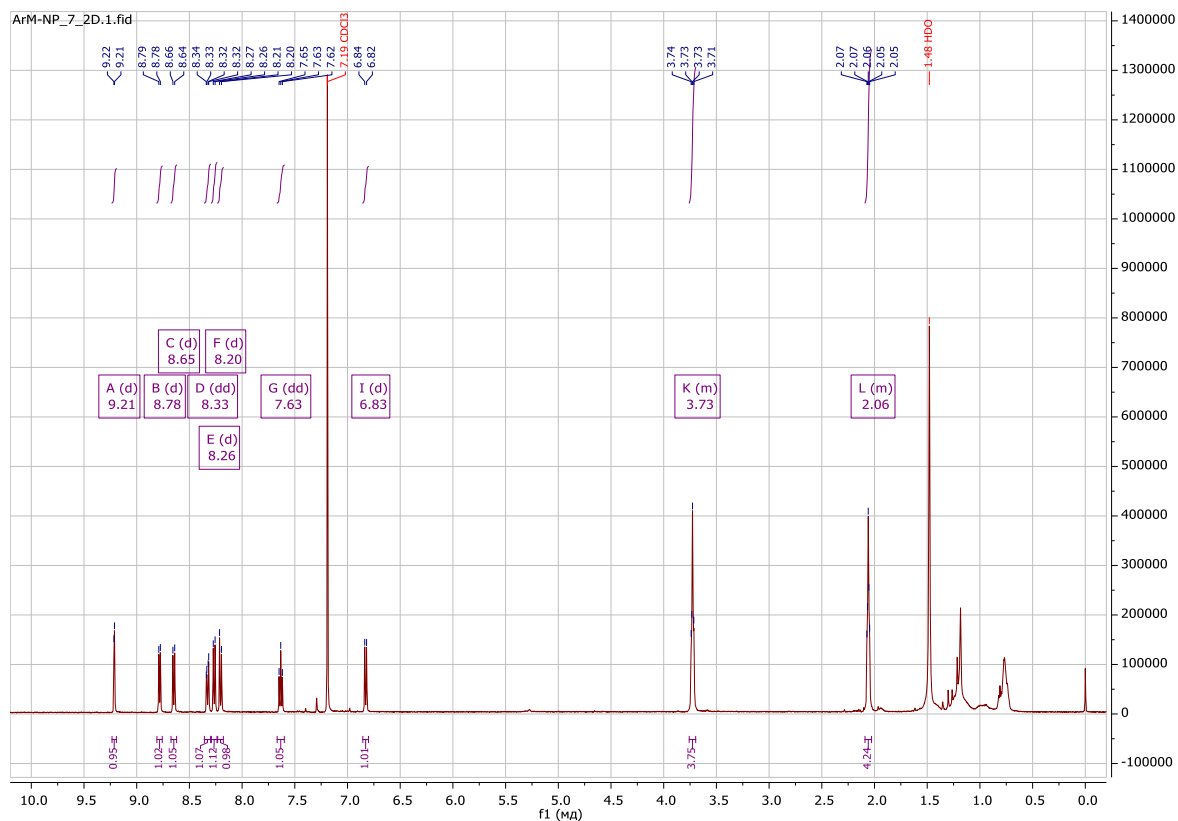

**Figure S2.** <sup>1</sup>H-NMR (500 MHz, CDCl<sub>3</sub>) spectrum of compound **3**.

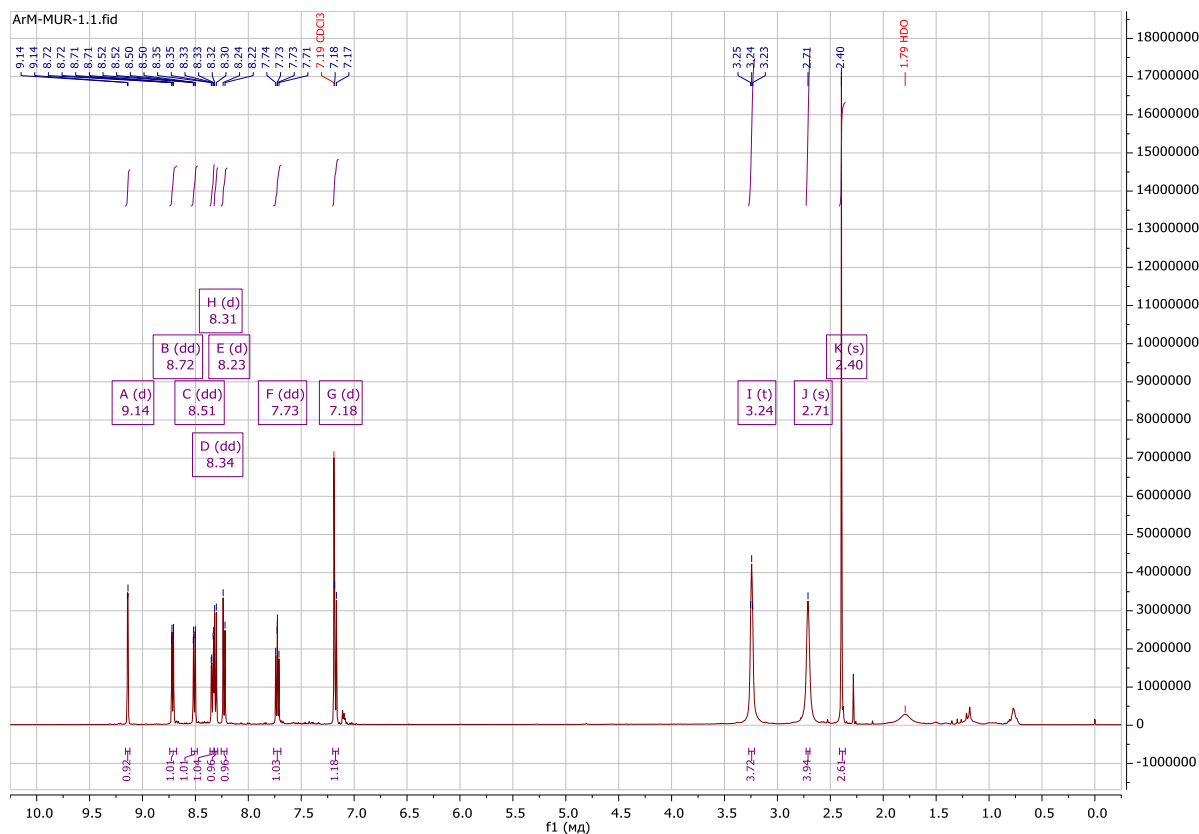

**Figure S3.** <sup>1</sup>H-NMR (500 MHz, CDCl<sub>3</sub>) spectrum of compound **4**.



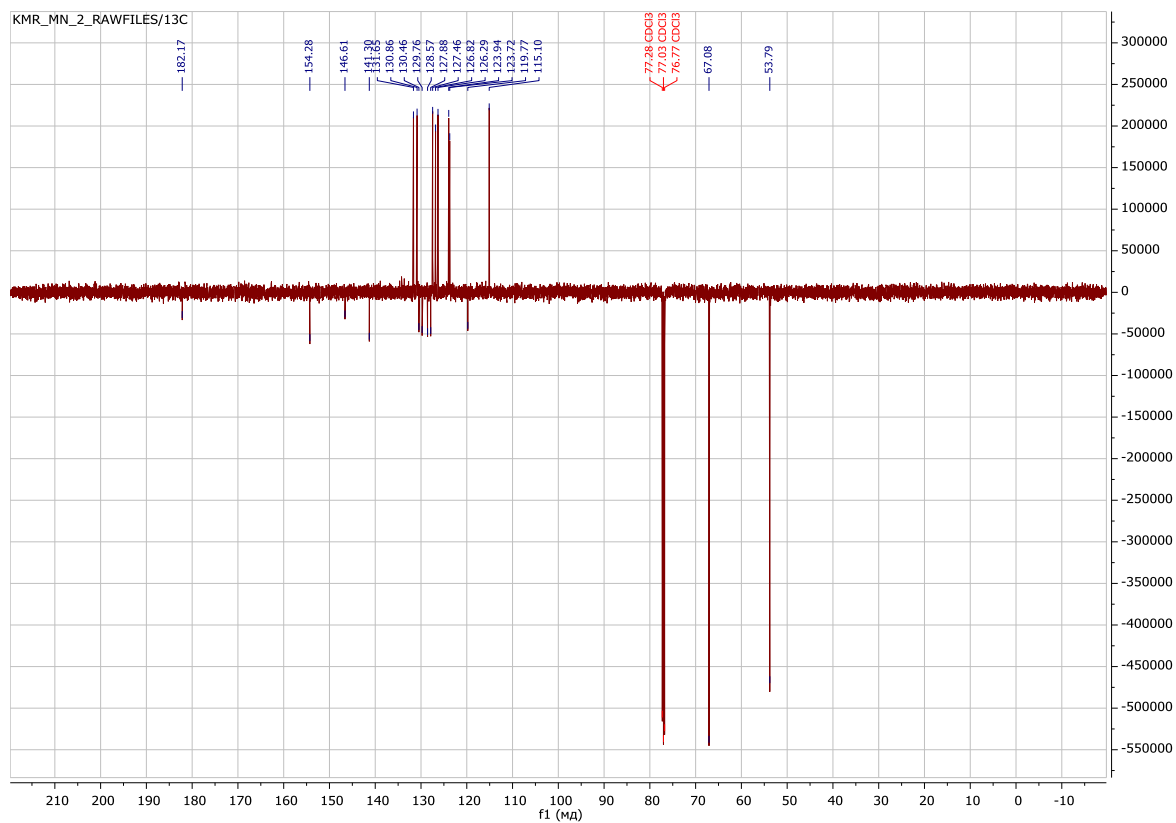

**Figure S6.** APT NMR (126 MHz, CDCl<sub>3</sub>) spectrum of compound **2**.

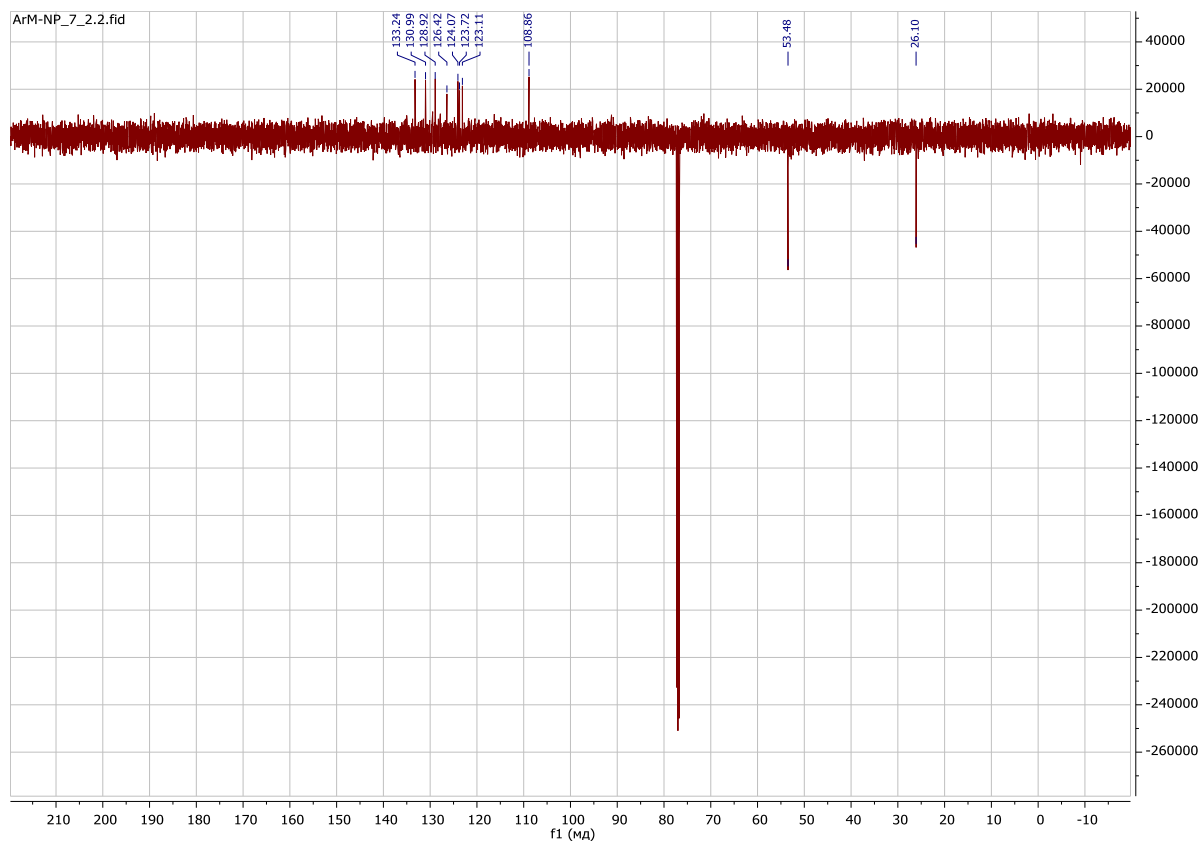

**Figure S7.** APT NMR (126 MHz, CDCl<sub>3</sub>) spectrum of compound **3**.

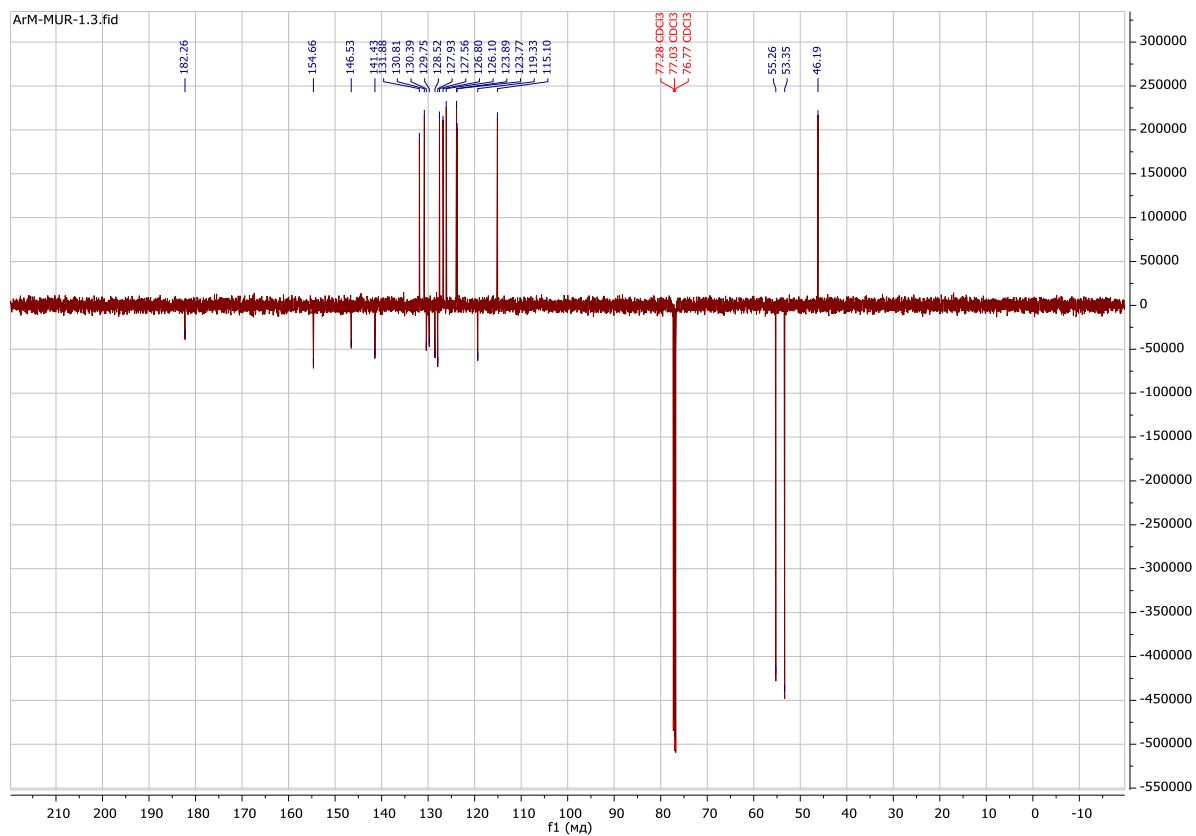

**Figure S8.** APT NMR (126 MHz, CDCl<sub>3</sub>) spectrum of compound **4**.

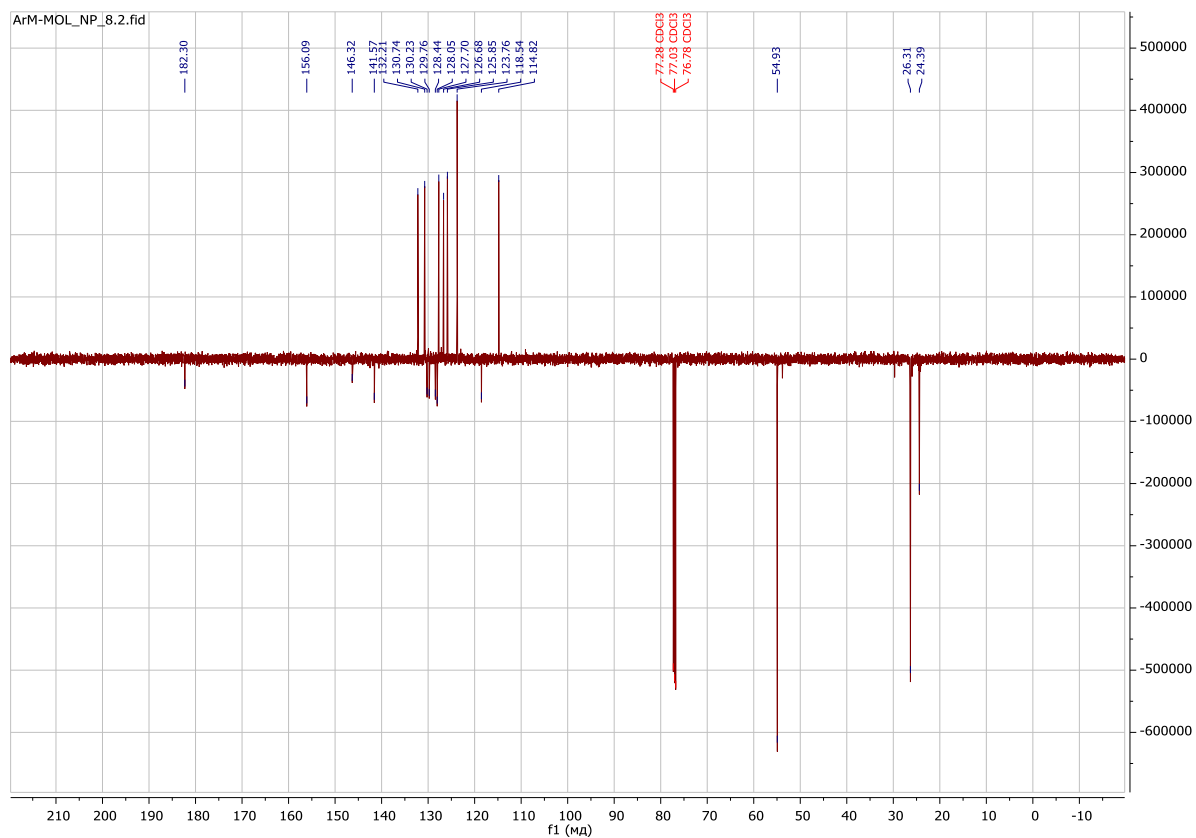

**Figure S9.** APT NMR (126 MHz, CDCl<sub>3</sub>) spectrum of compound **5**.

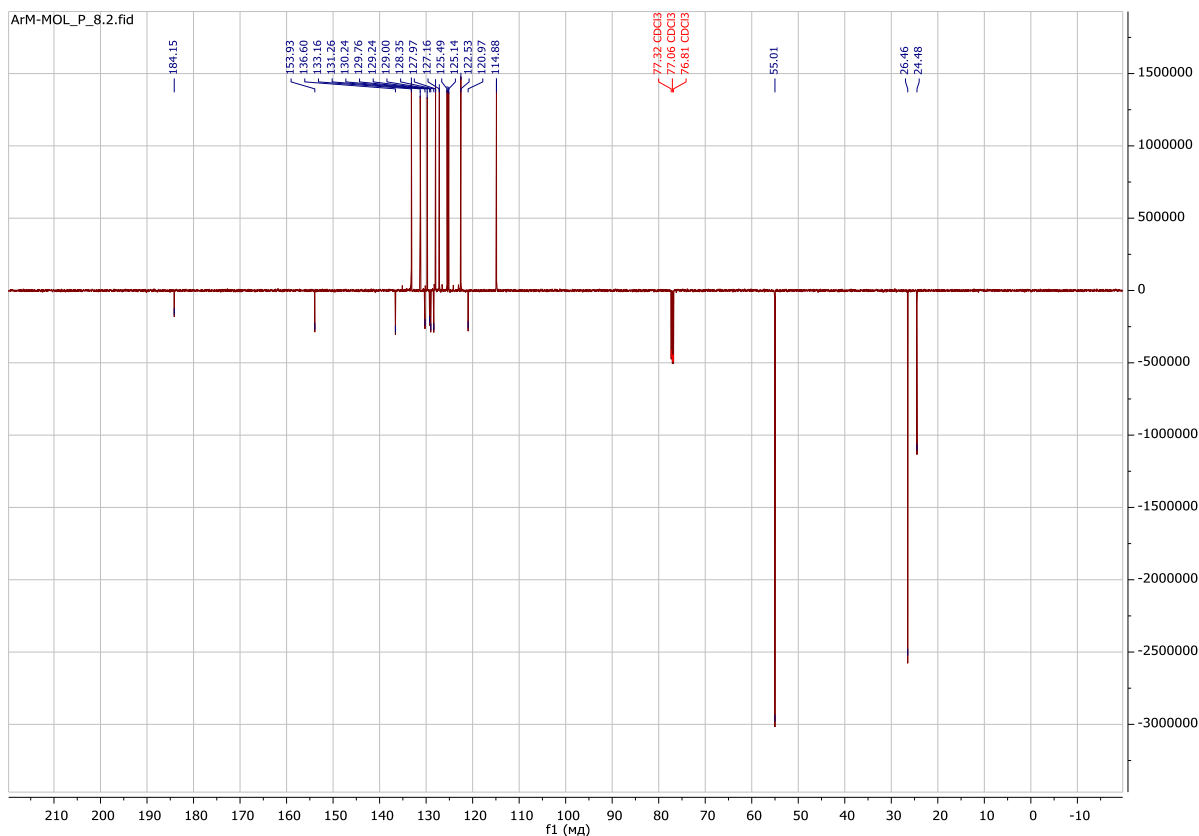

**Figure S10.** APT NMR (126 MHz, CDCl<sub>3</sub>) spectrum of compound **6**.

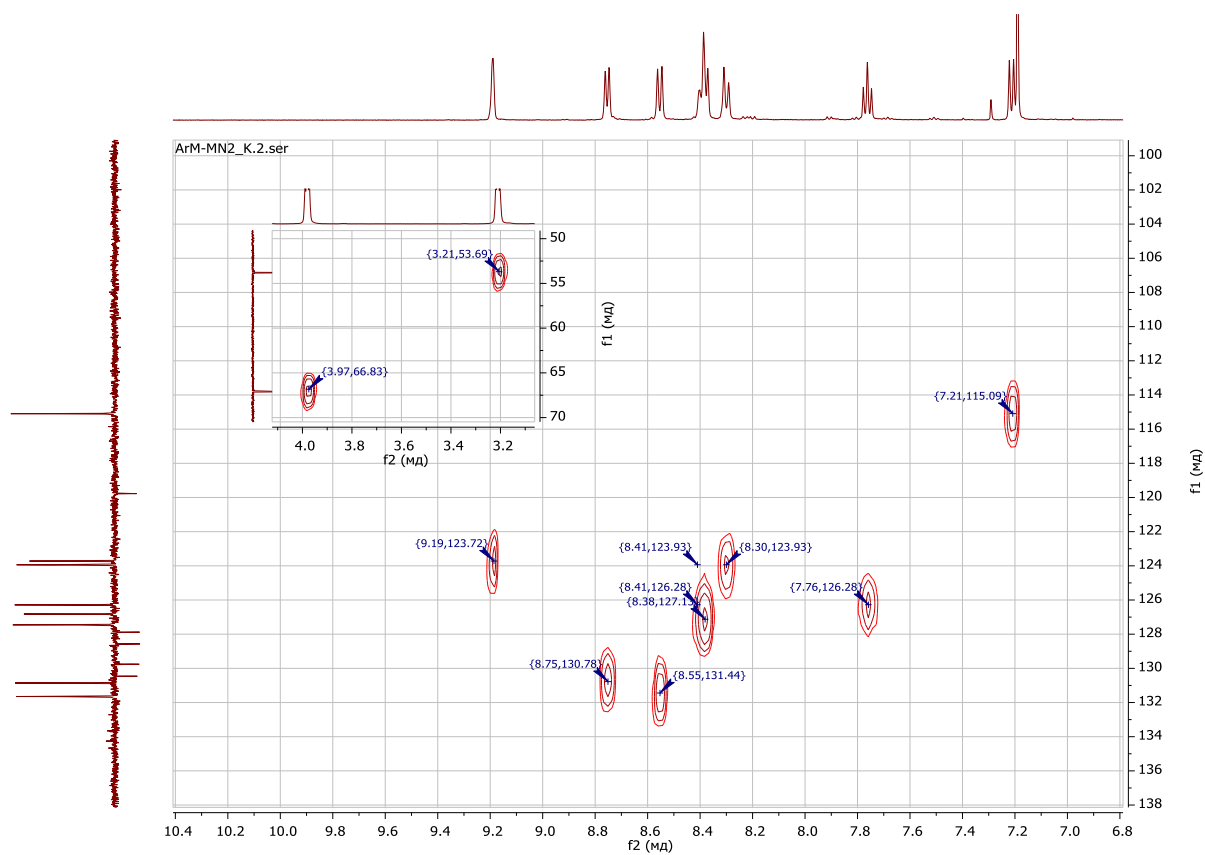

**Figure S11.** Expanded HSQC NMR spectrum (CDCl<sub>3</sub>) of compound **2**.

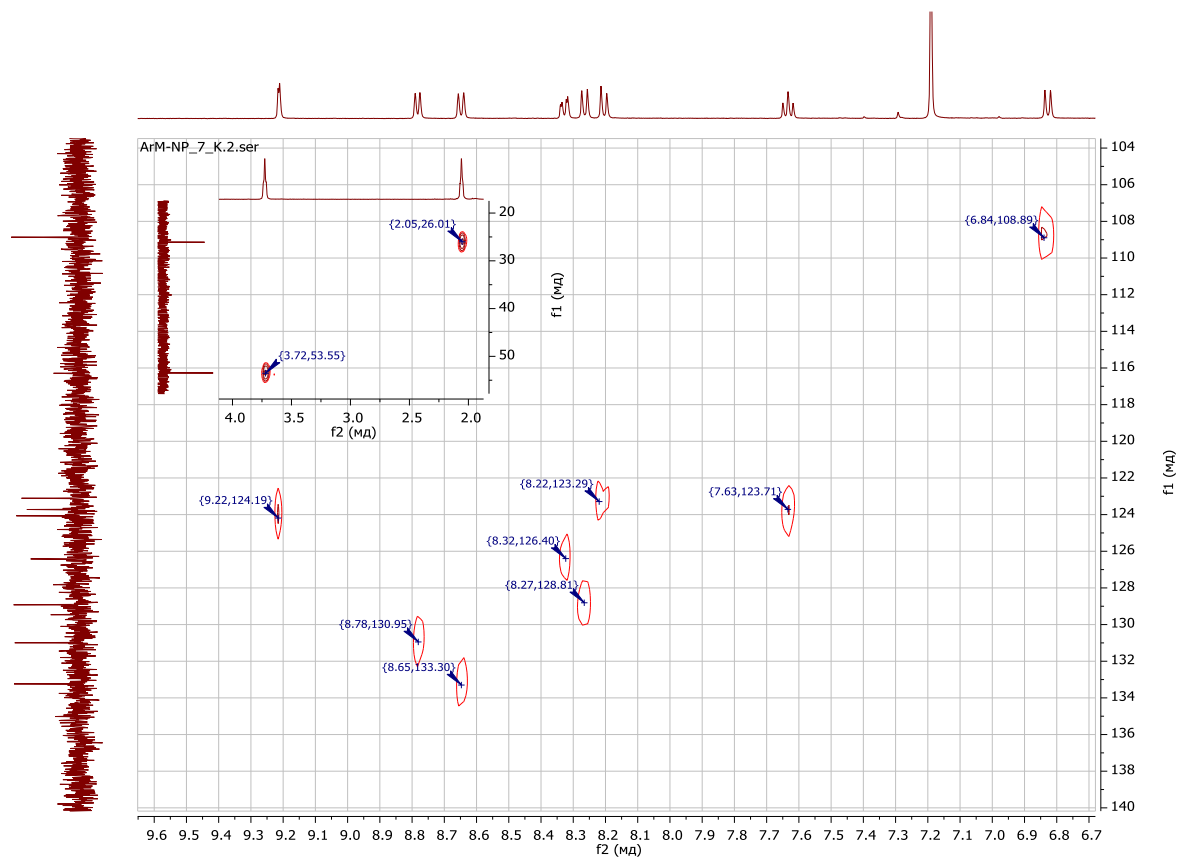

**Figure S12.** Expanded HSQC NMR spectrum (CDCl<sub>3</sub>) of compound **3**.

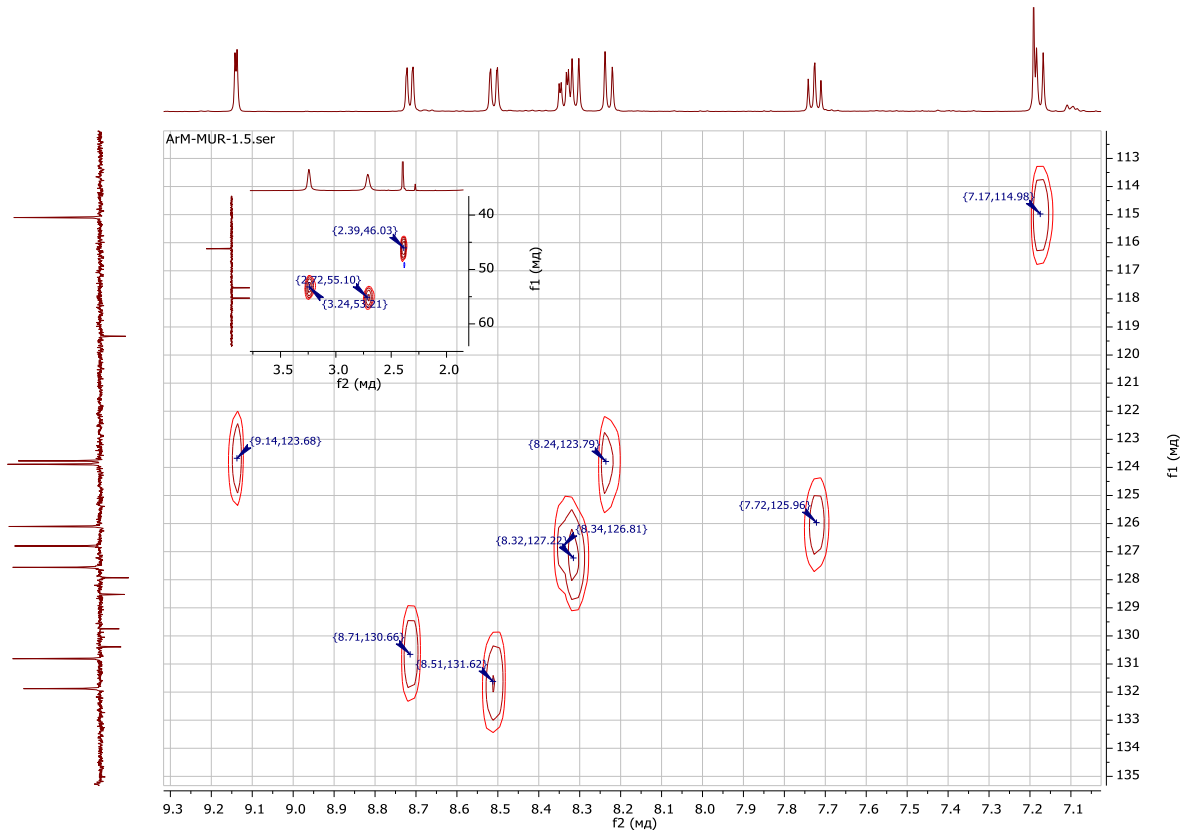

**Figure S13.** Expanded HSQC NMR spectrum (CDCl<sub>3</sub>) of compound **4**.

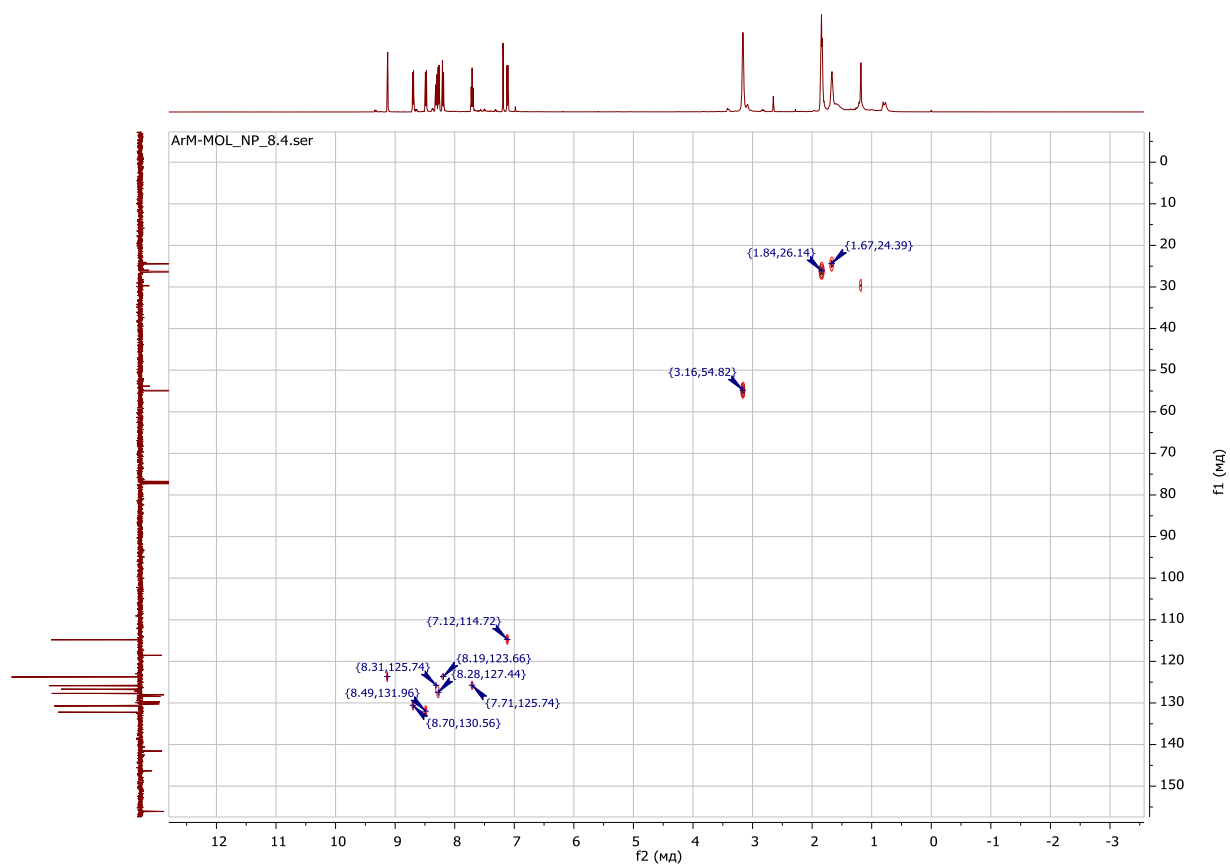

**Figure S14.** HSQC NMR spectrum ( $\text{CDCl}_3$ ) of compound **5**.

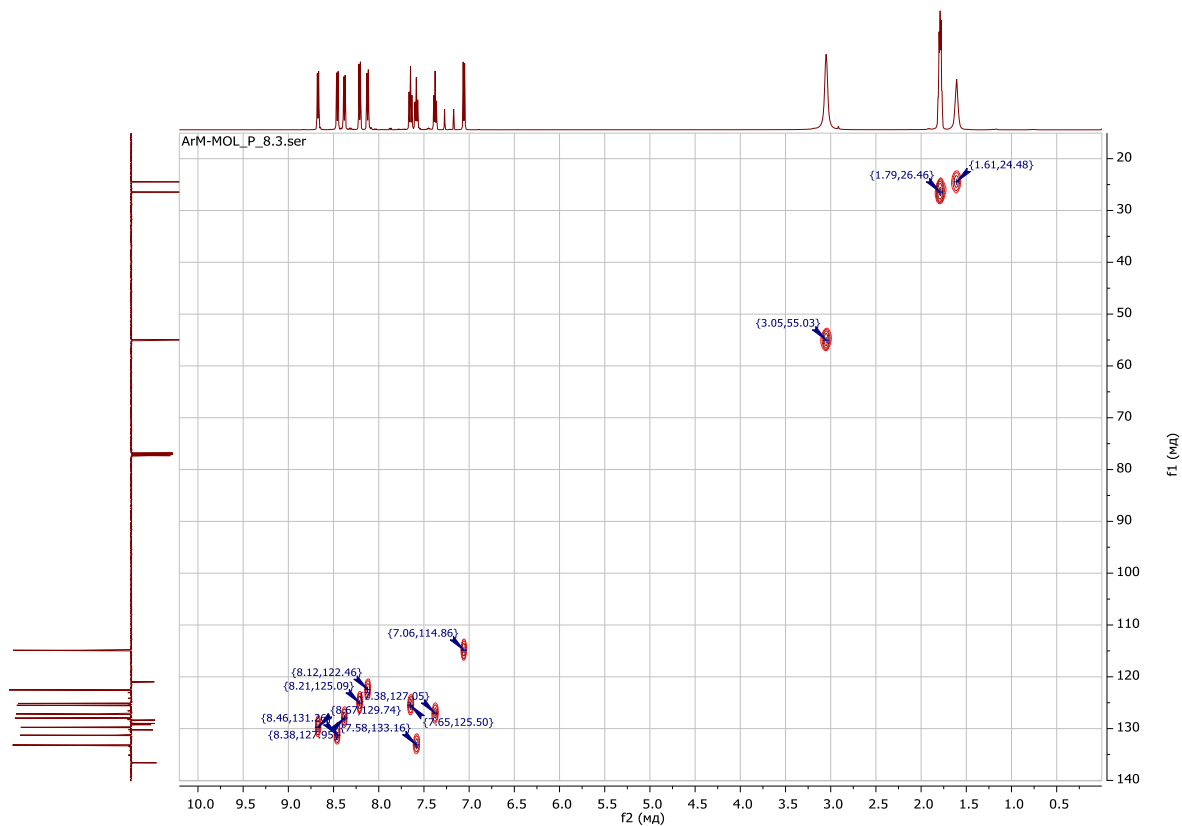

**Figure S15.** HSQC NMR spectrum ( $\text{CDCl}_3$ ) of compound **6**.



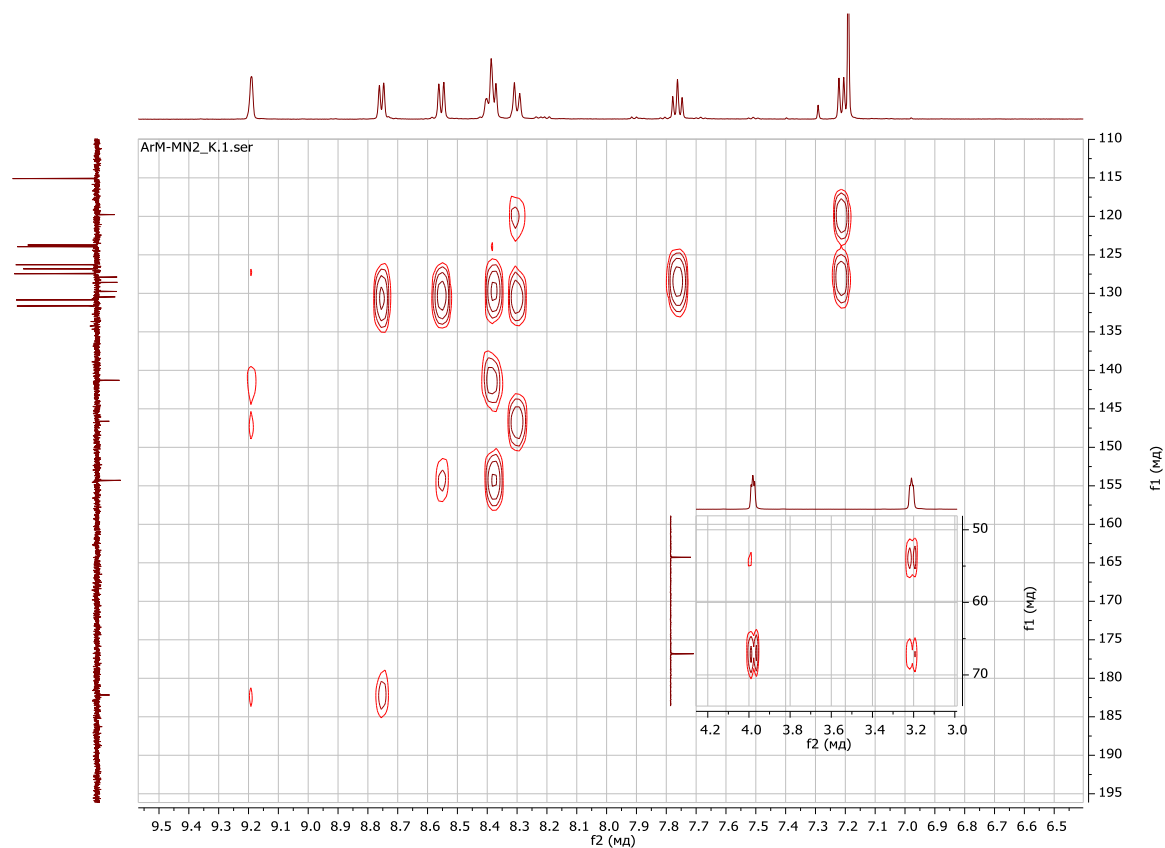

**Figure S16.** Expanded HMBC spectrum ( $\text{CDCl}_3$ ) of compound **2**.

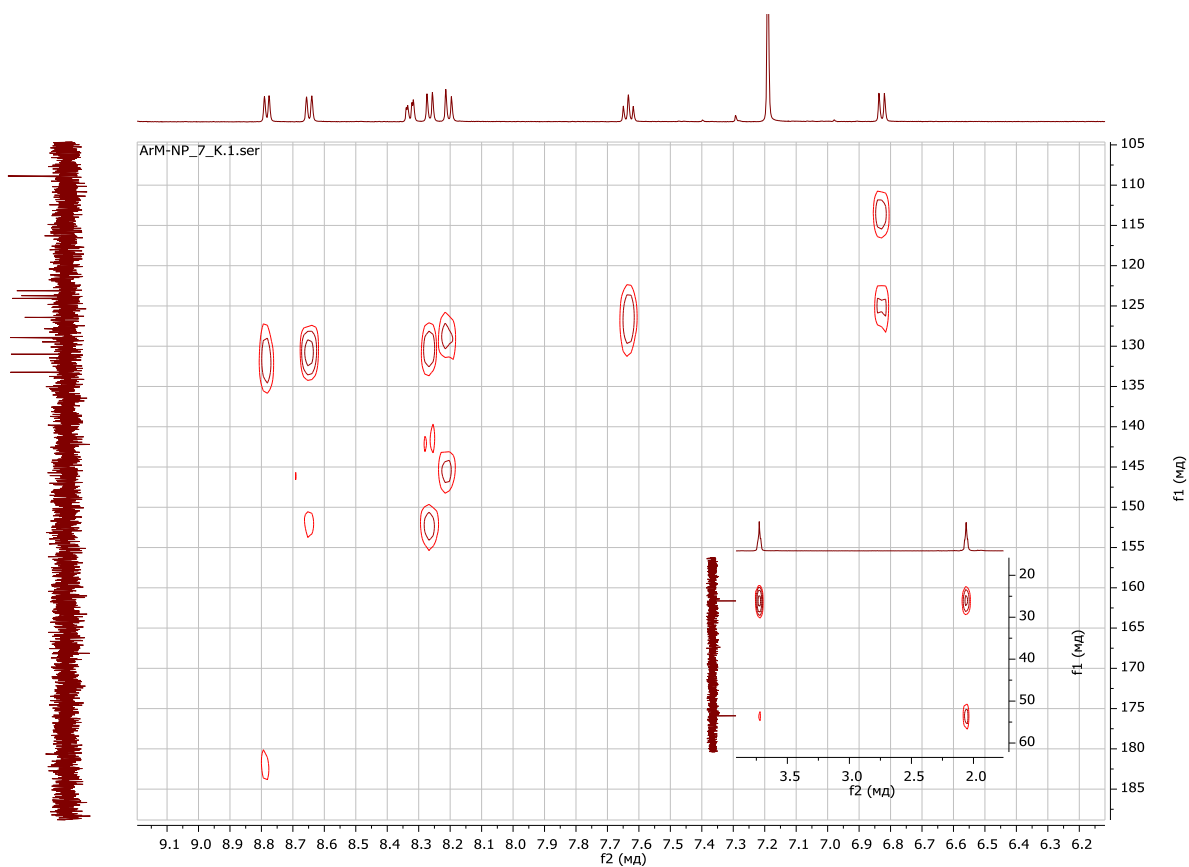

**Figure S17.** Expanded HMBC spectrum ( $\text{CDCl}_3$ ) of compound **3**.

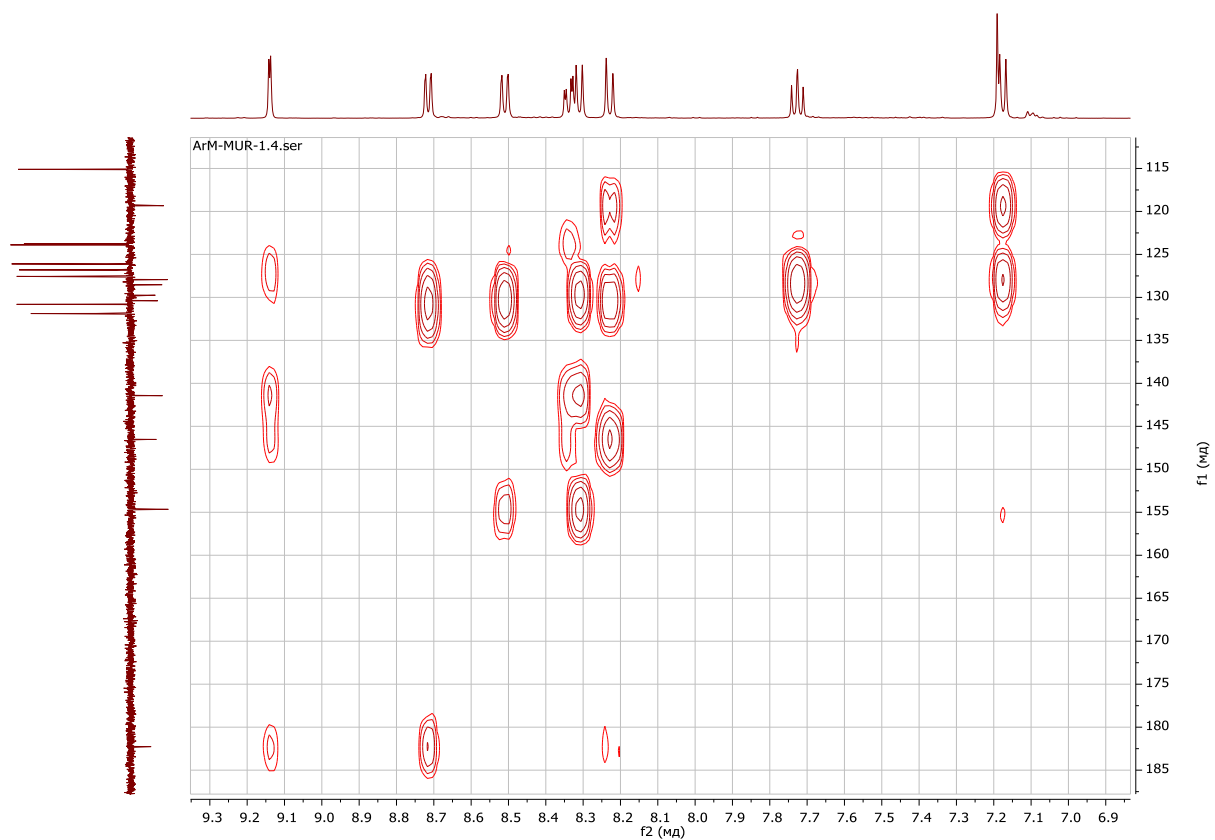

**Figure S18.** Expanded HMBC spectrum (CDCl<sub>3</sub>) of compound **4**.

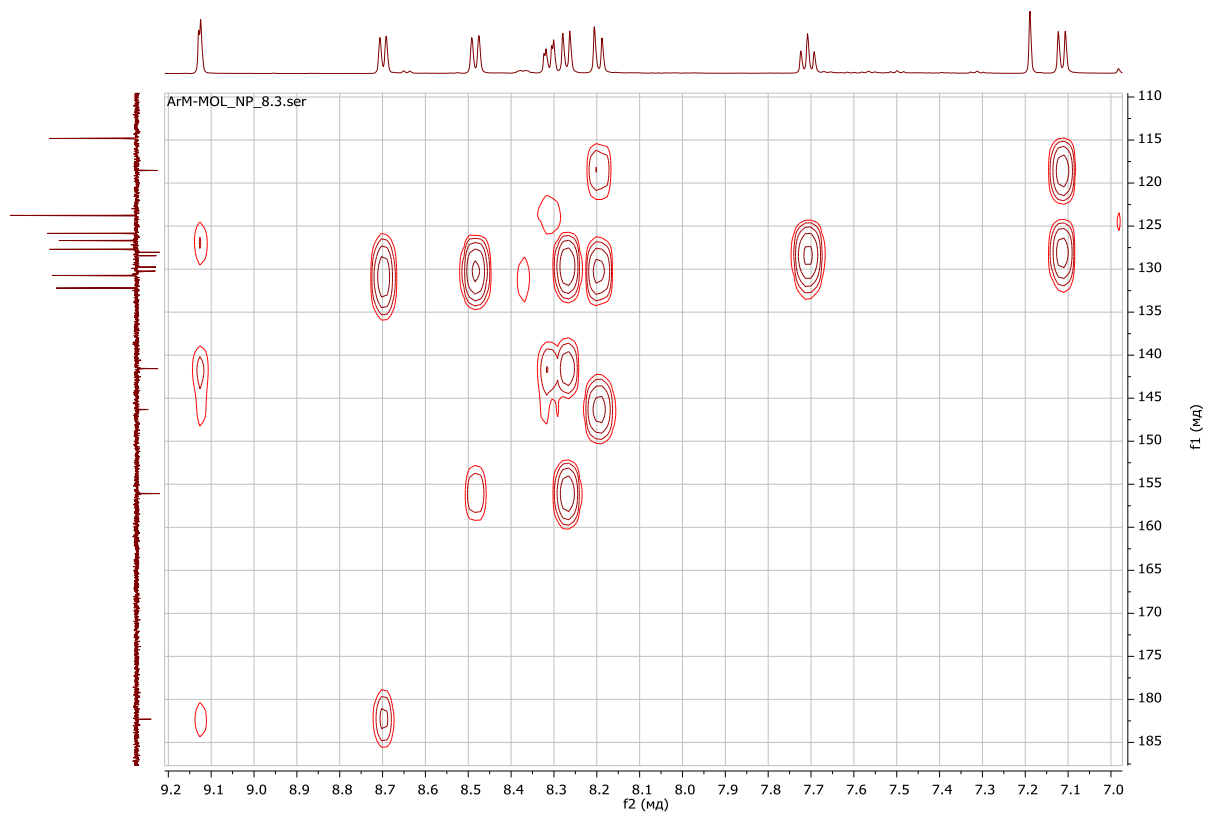

**Figure S19.** Expanded HMBC spectrum (CDCl<sub>3</sub>) of compound **5**.

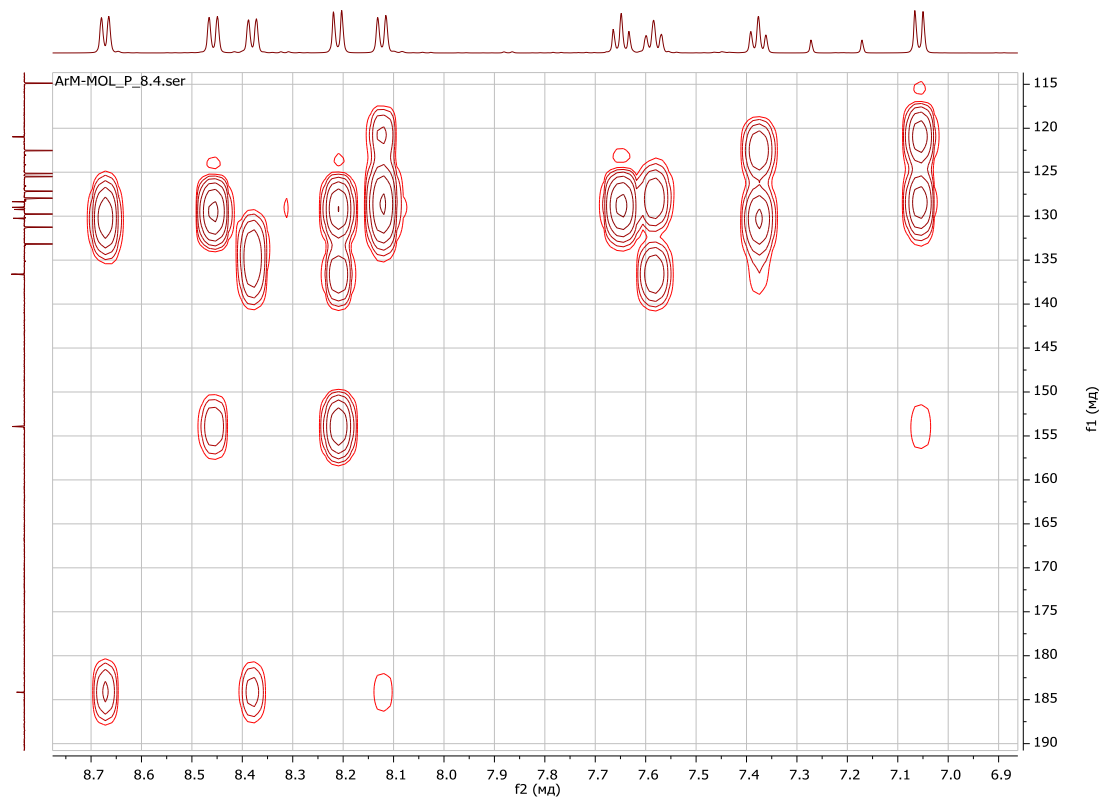

**Figure S20.** Expanded HMBC spectrum ( $\text{CDCl}_3$ ) of compound **6**.

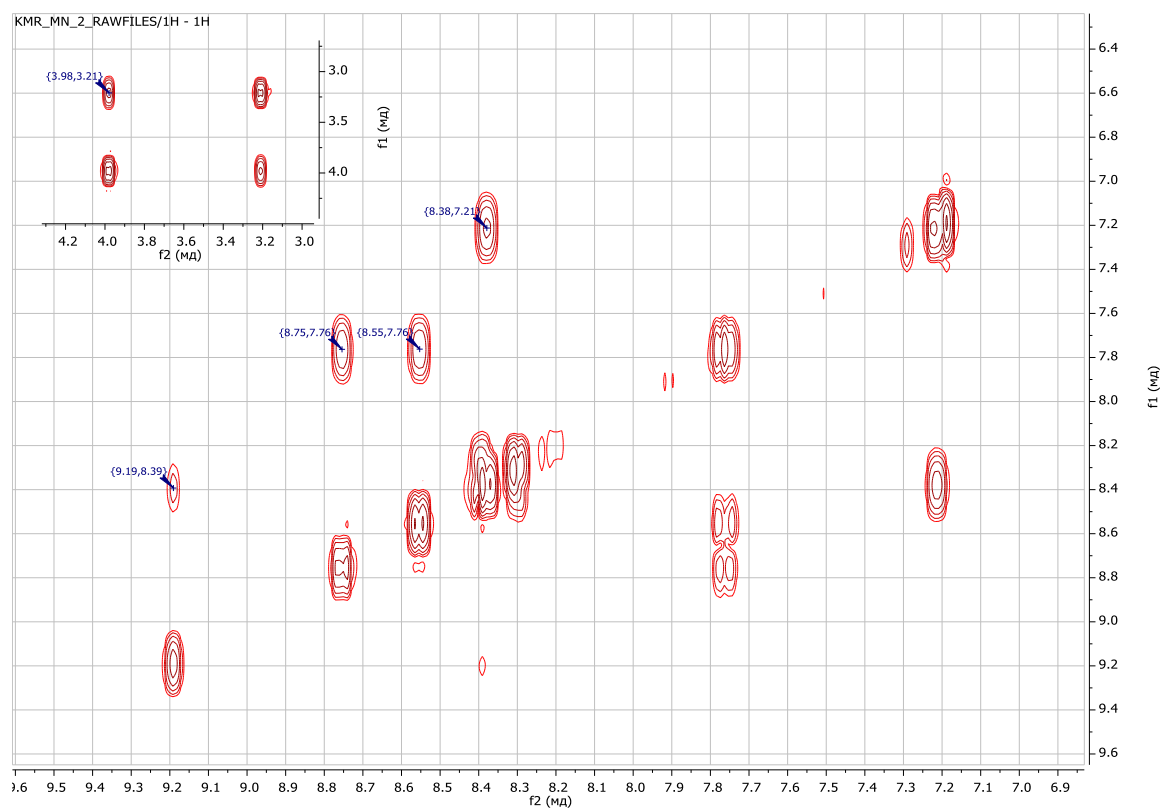

**Figure S21.** Expanded  $^1\text{H}$ - $^1\text{H}$  COSY spectrum ( $\text{CDCl}_3$ ) of compound **2**.

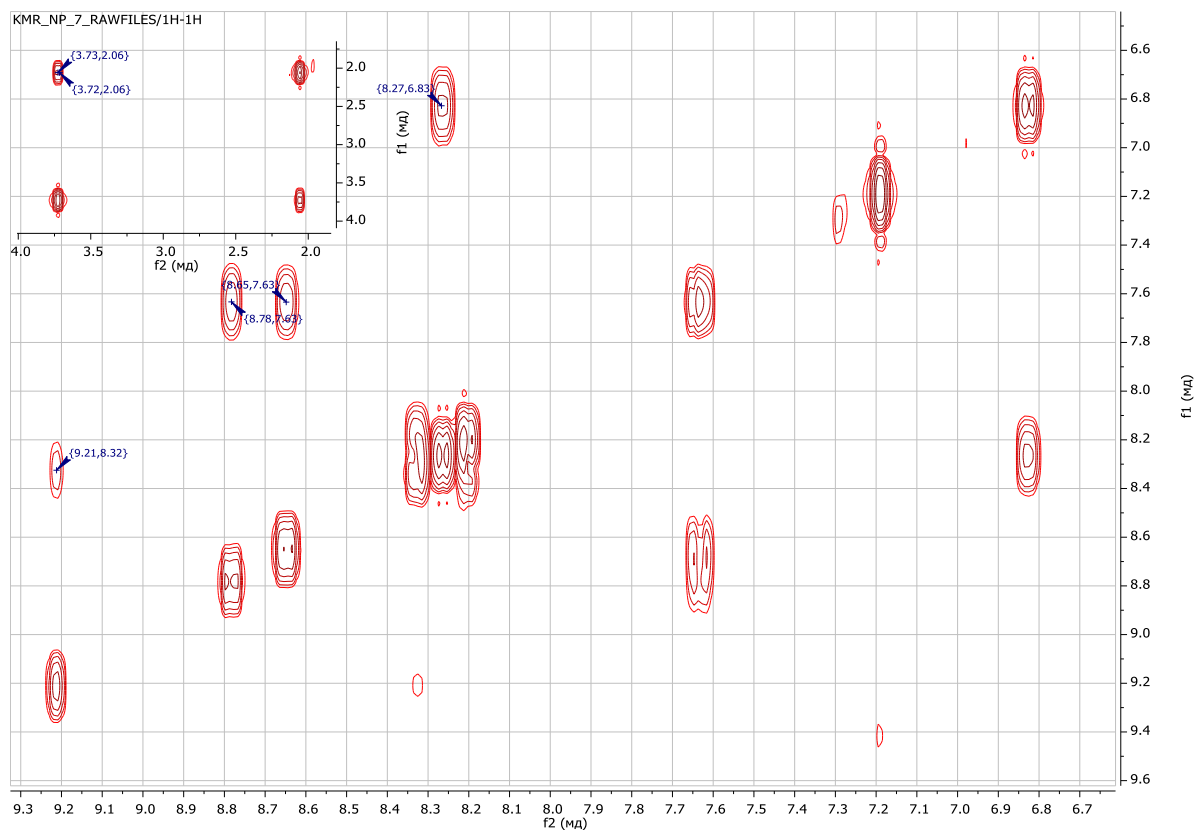

**Figure S22.** Expanded  $^1\text{H}$ - $^1\text{H}$  COSY spectrum ( $\text{CDCl}_3$ ) of compound **3**.

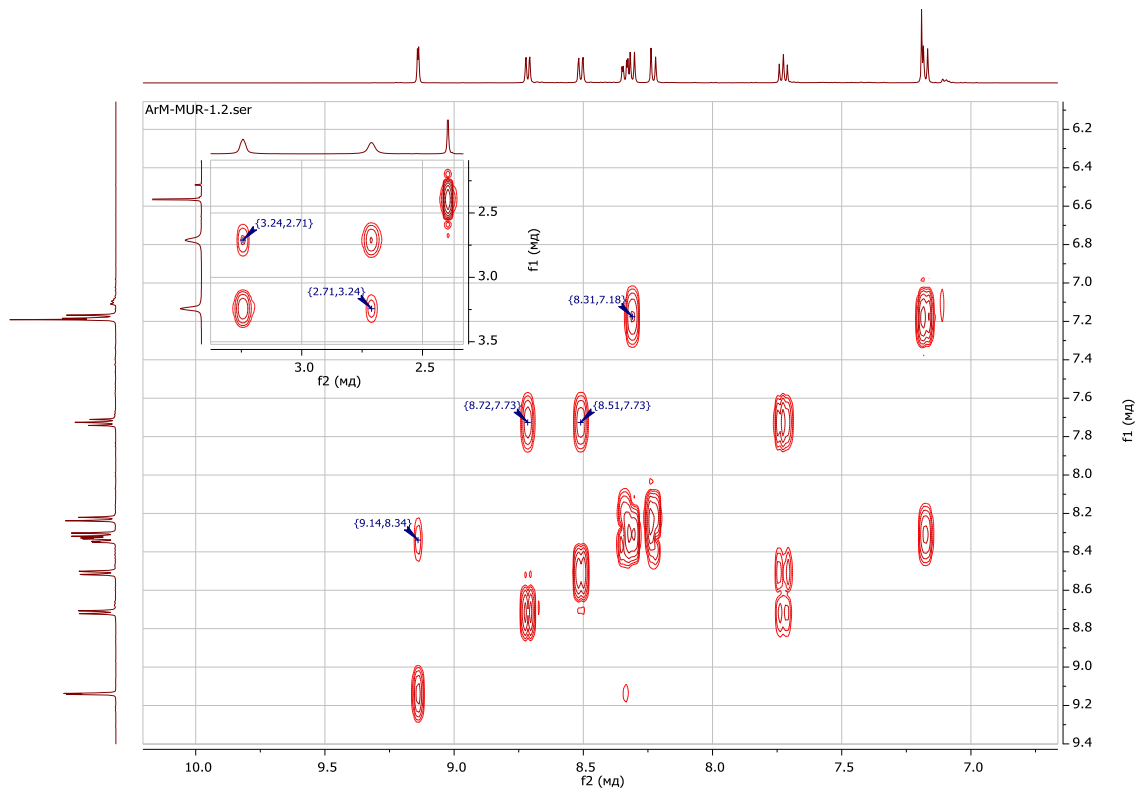

**Figure S23.** Expanded  $^1\text{H}$ - $^1\text{H}$  COSY spectrum ( $\text{CDCl}_3$ ) of compound **4**.

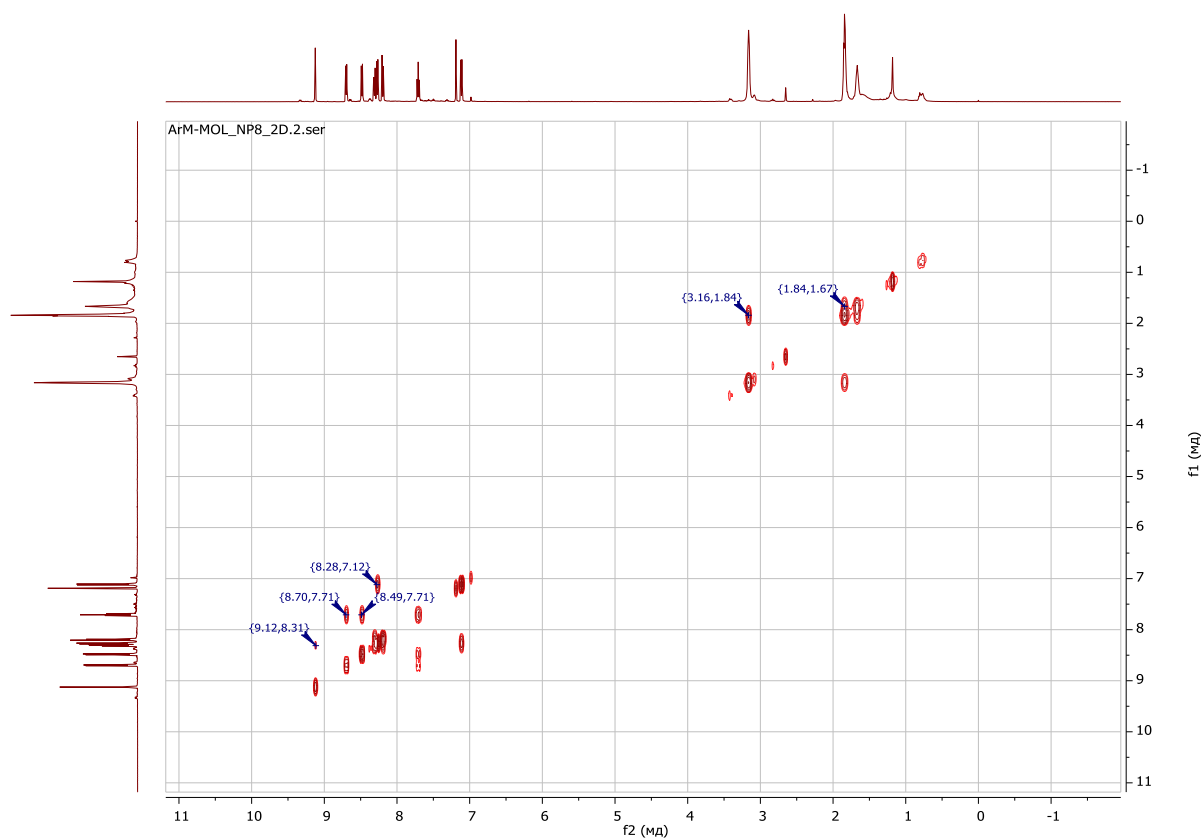

**Figure S24.**  $^1\text{H}$ - $^1\text{H}$  COSY spectrum (CDCl<sub>3</sub>) of compound **5**.

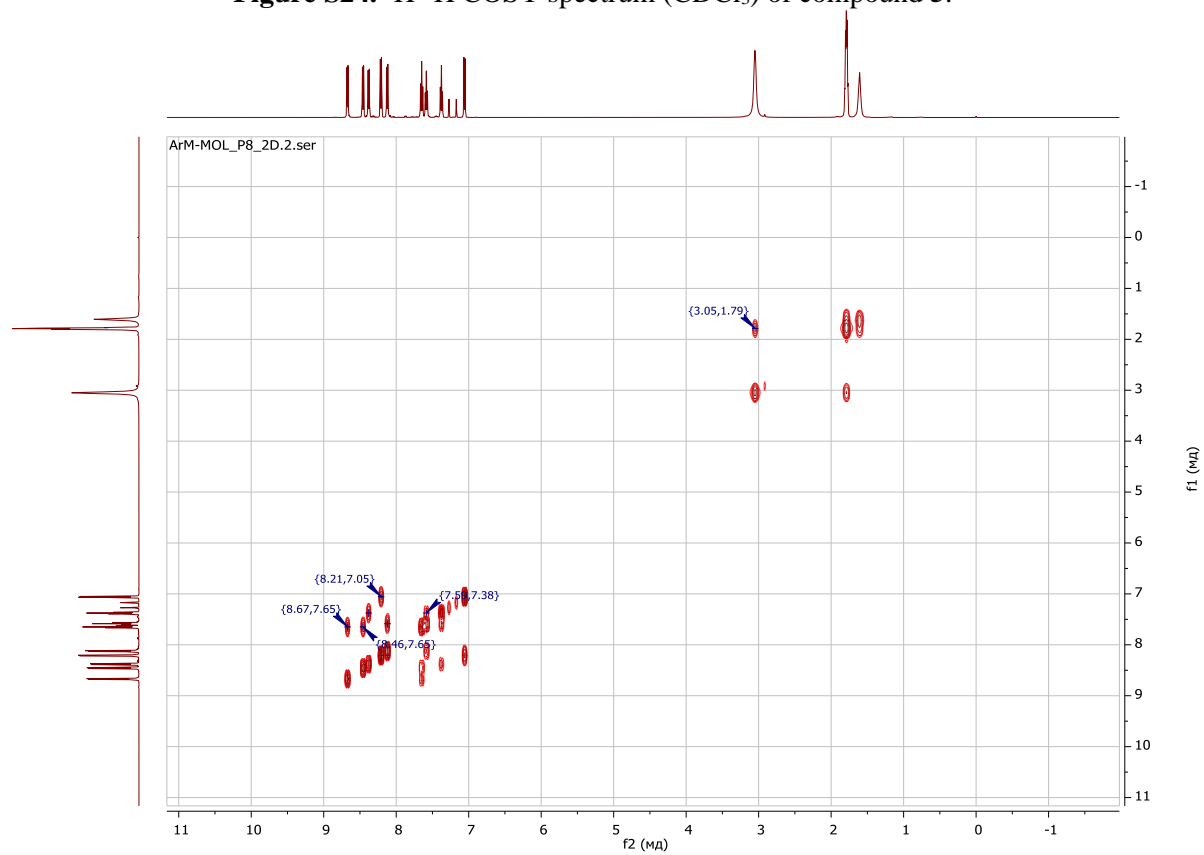

**Figure S25.**  $^1\text{H}$ - $^1\text{H}$  COSY spectrum (CDCl<sub>3</sub>) of compound **6**.

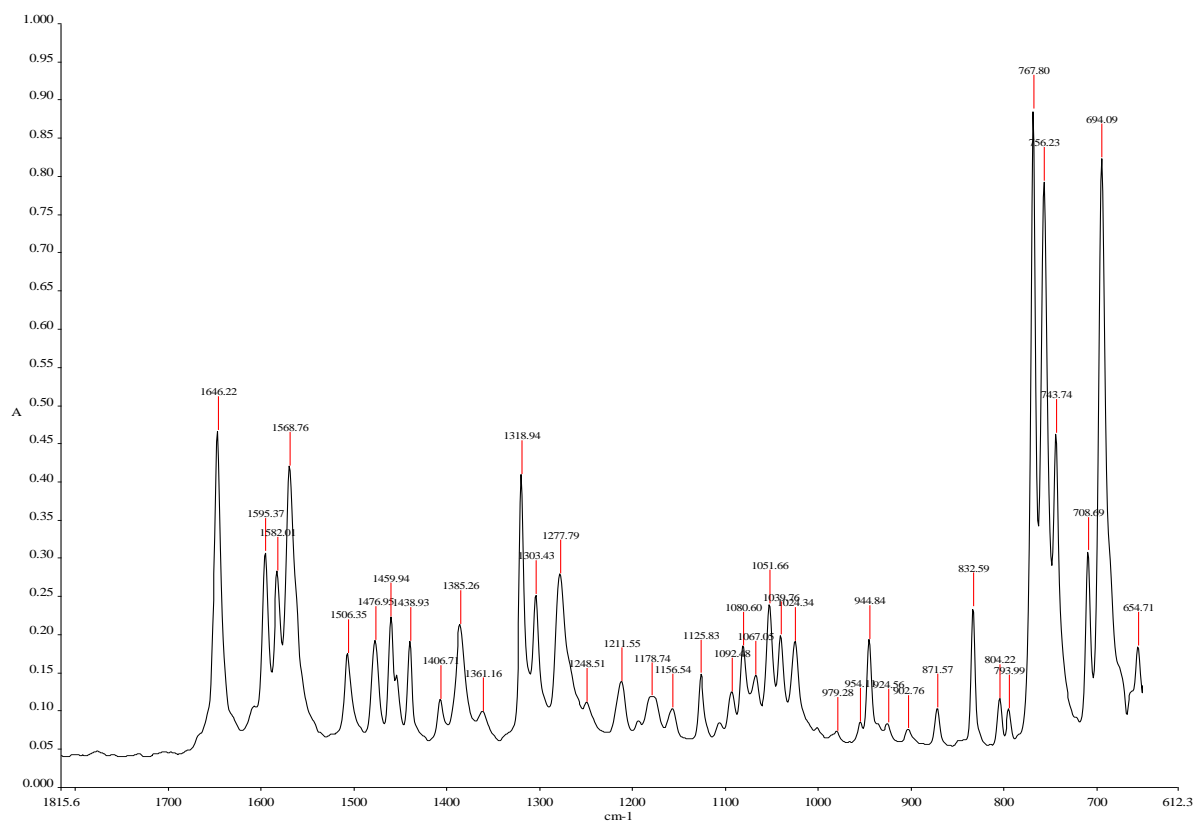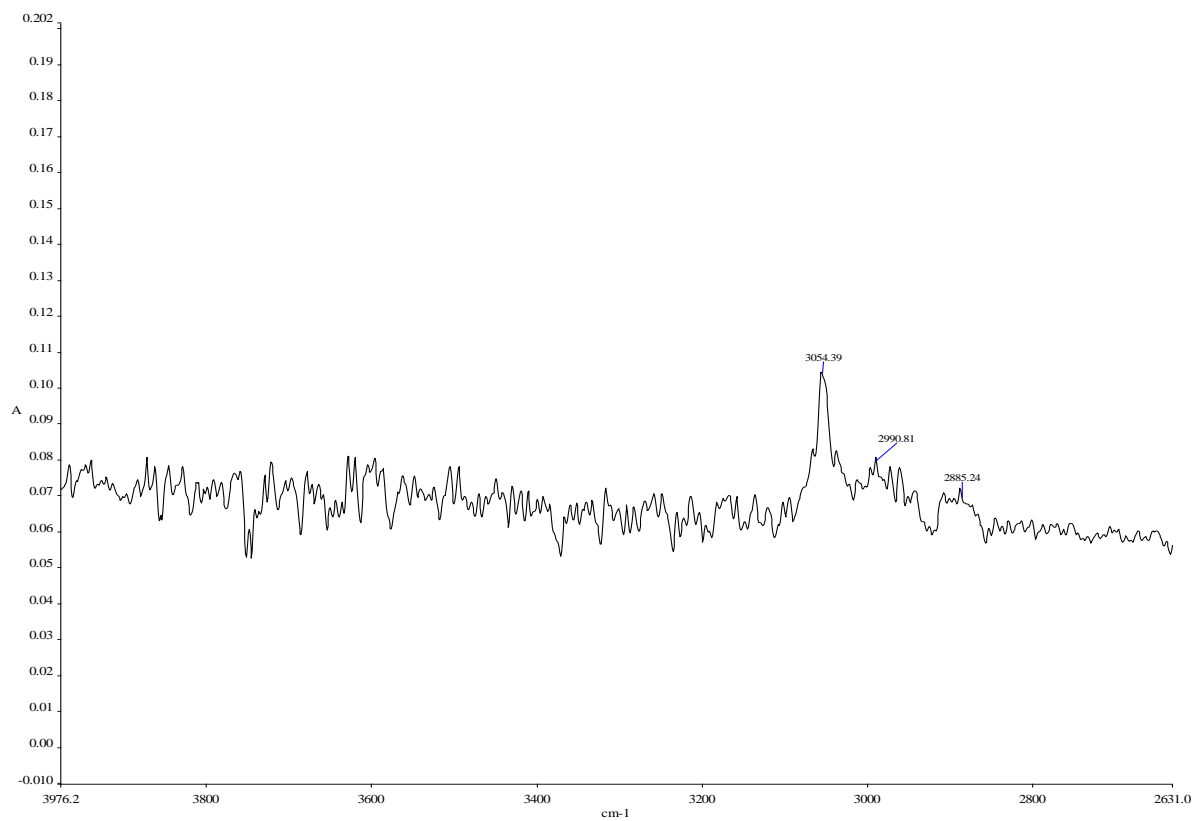

**Figure S26.** FTIR spectrum (neat) of compound 2.

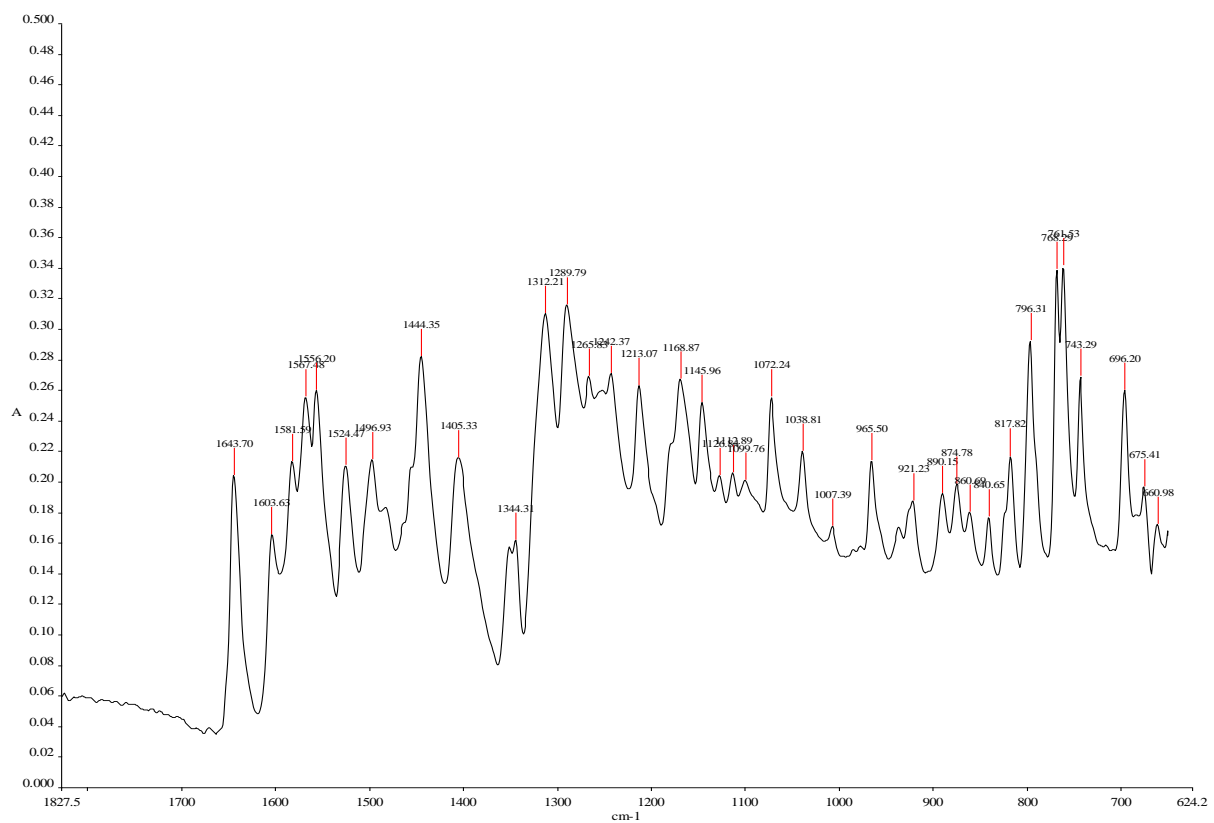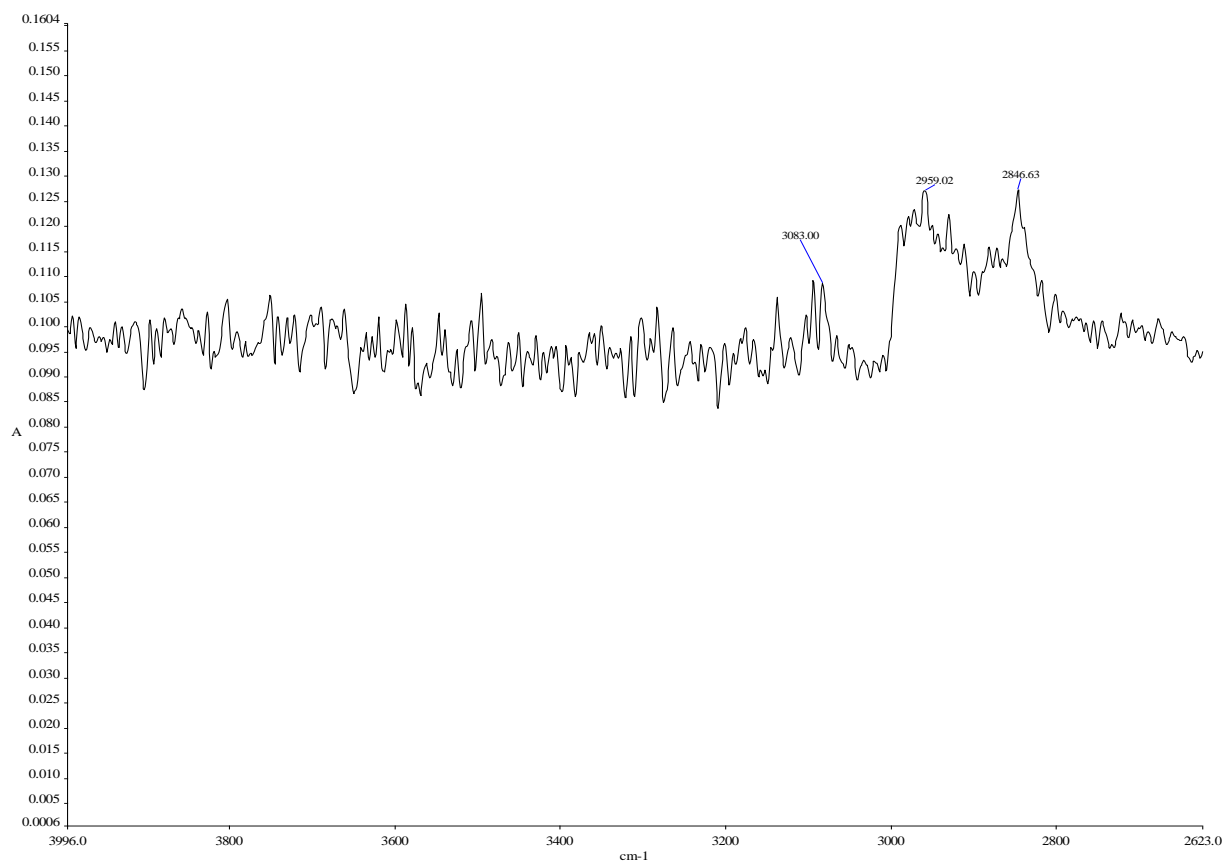

**Figure S27.** FTIR spectrum (neat) of compound **3**.

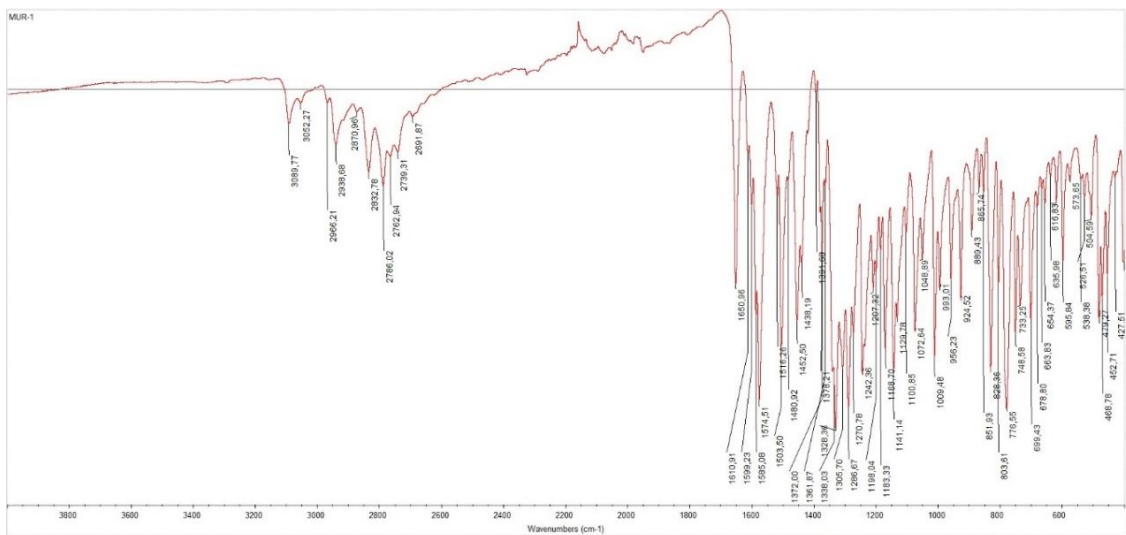

Figure S28. FTIR spectrum (neat) of compound 4.

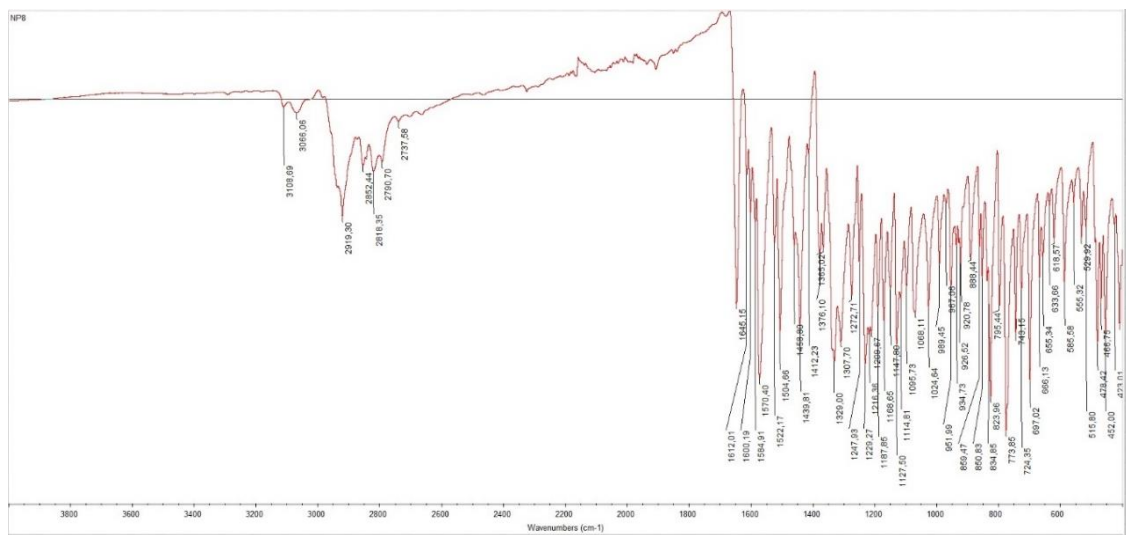

Figure S29. FTIR spectrum (neat) of compound 5.

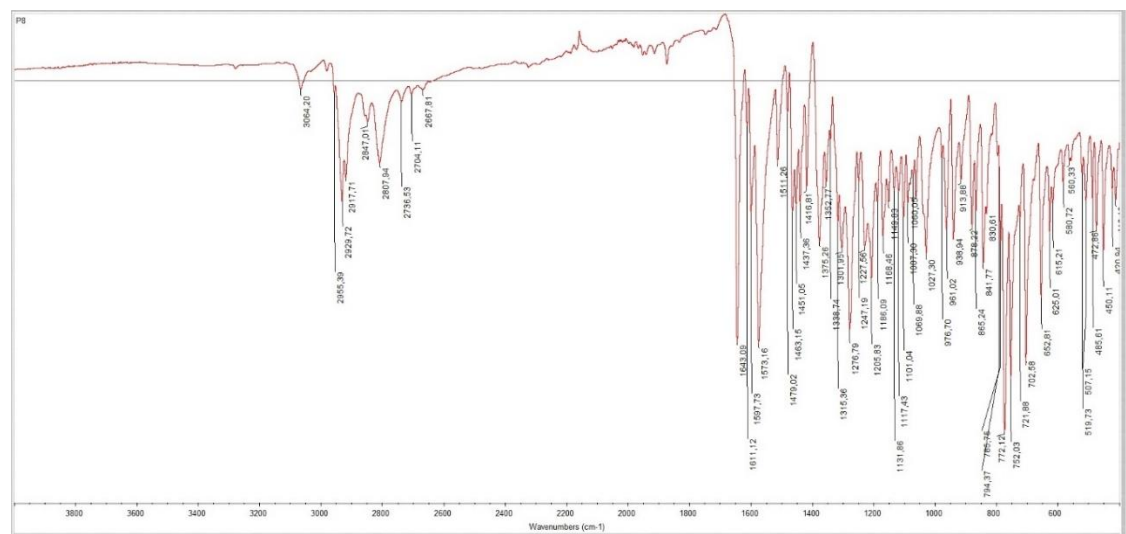

Figure S30. FTIR spectrum (neat) of compound 6.



R100019\_FIA\_M012\_20230309\_100409 #56 RT: 0.24 AV: 1 NL: 2.07E7  
T: FTMS + p ESI Full ms [100.0000-600.0000]

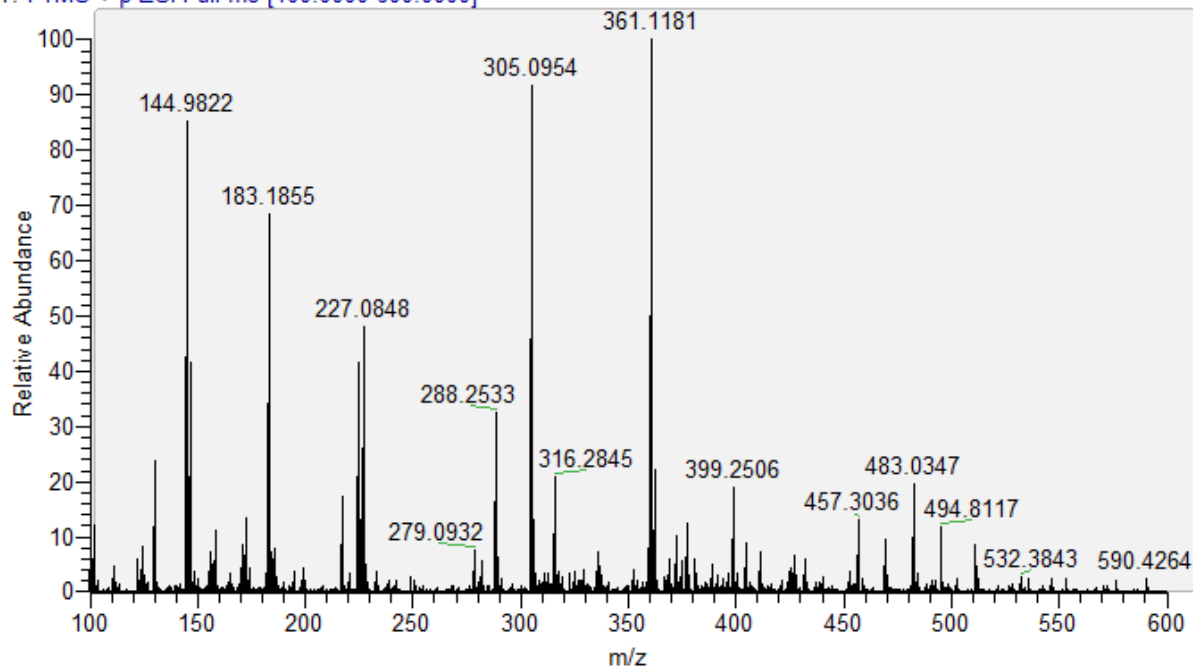

**Figure S31.** ESI-FTMS spectrum of compound 2.

R100019\_FIA\_M012\_20230309\_100410 #55 RT: 0.24 AV: 1 NL: 2.15E7  
T: FTMS + p ESI Full ms [100.0000-600.0000]

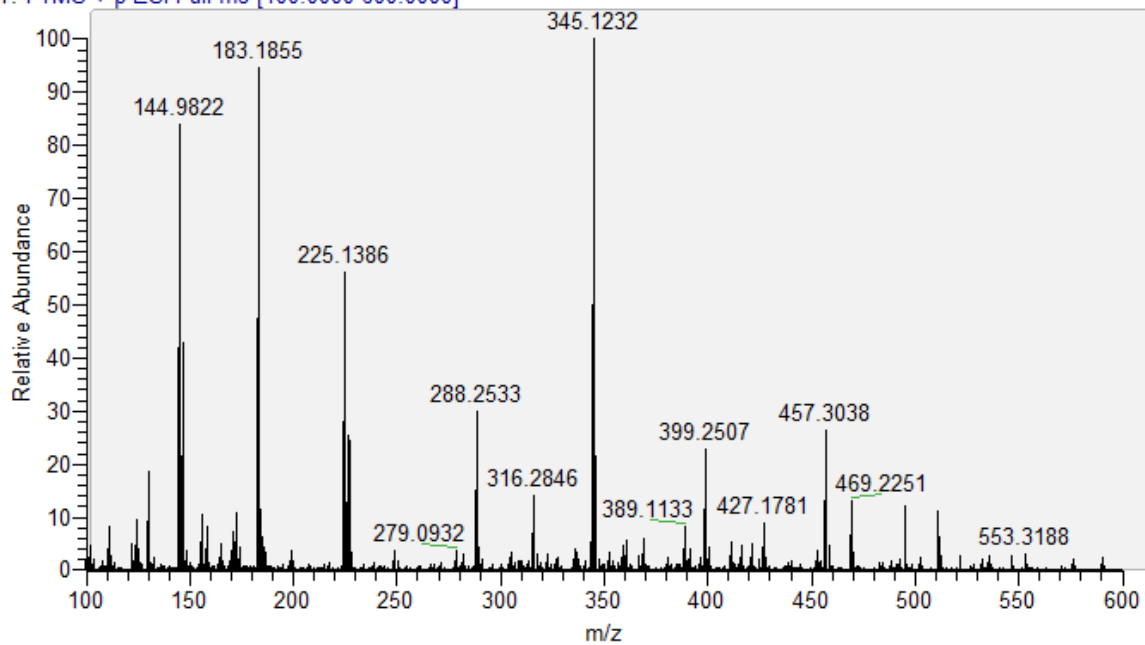

**Figure S32.** ESI-FTMS spectrum of compound 3.

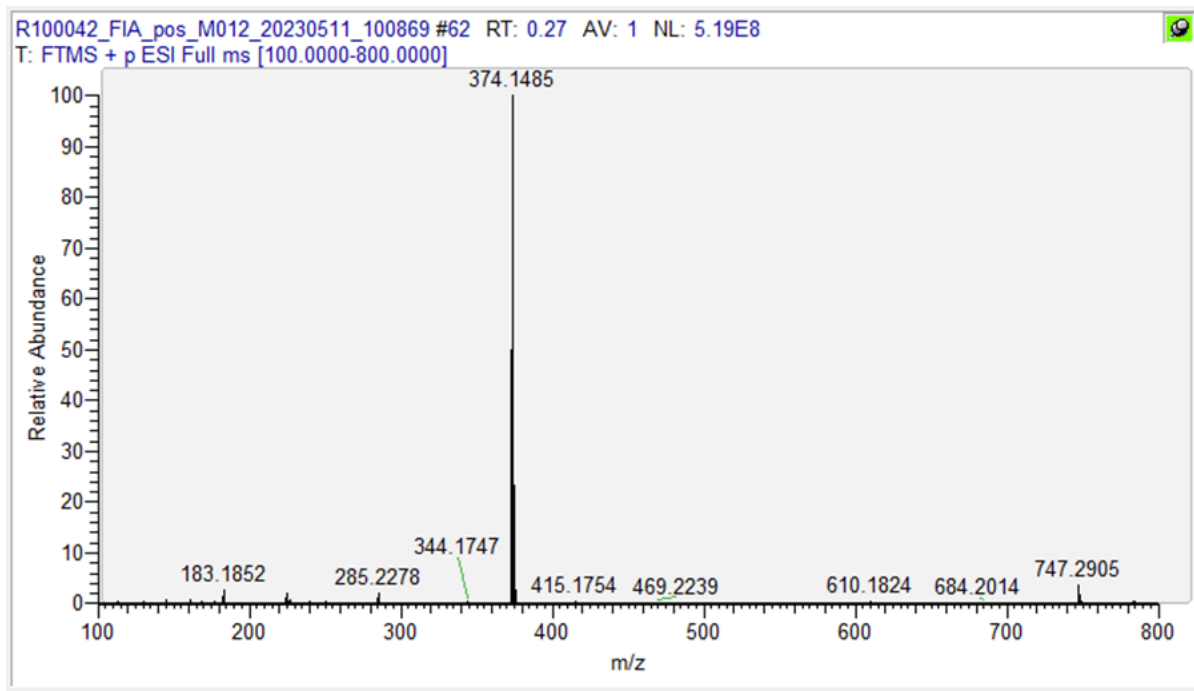

**Figure S33.** ESI-FTMS spectrum of compound **4**.

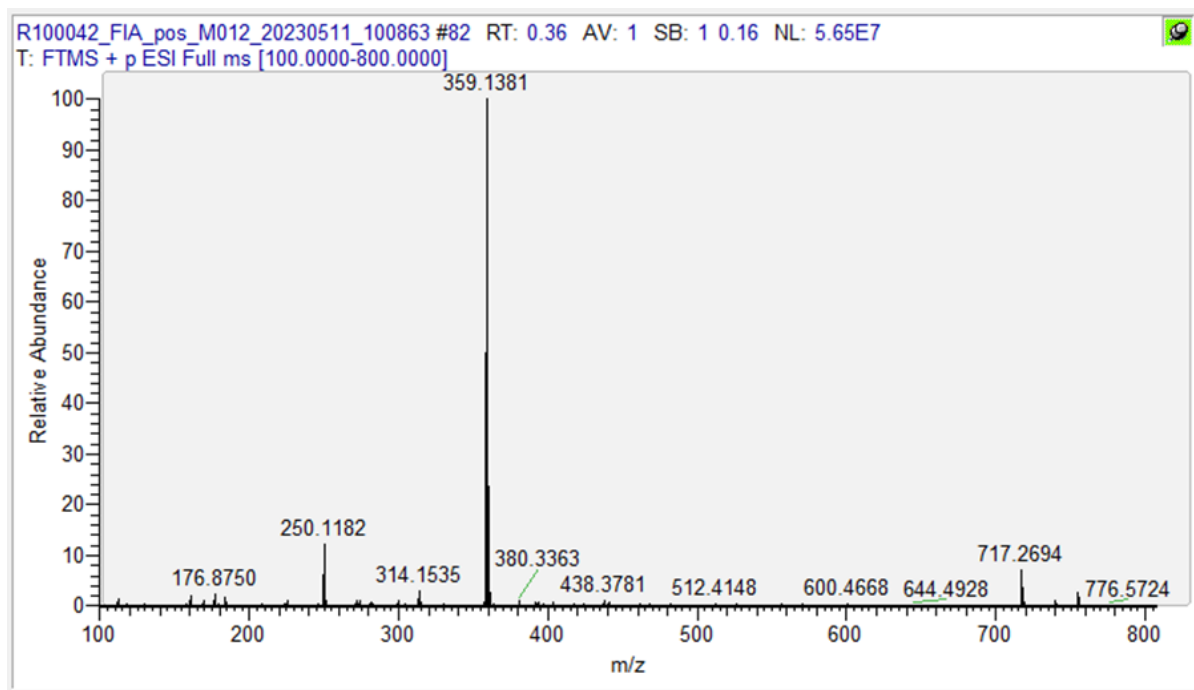

**Figure S34.** ESI-FTMS spectrum of compound **5**.

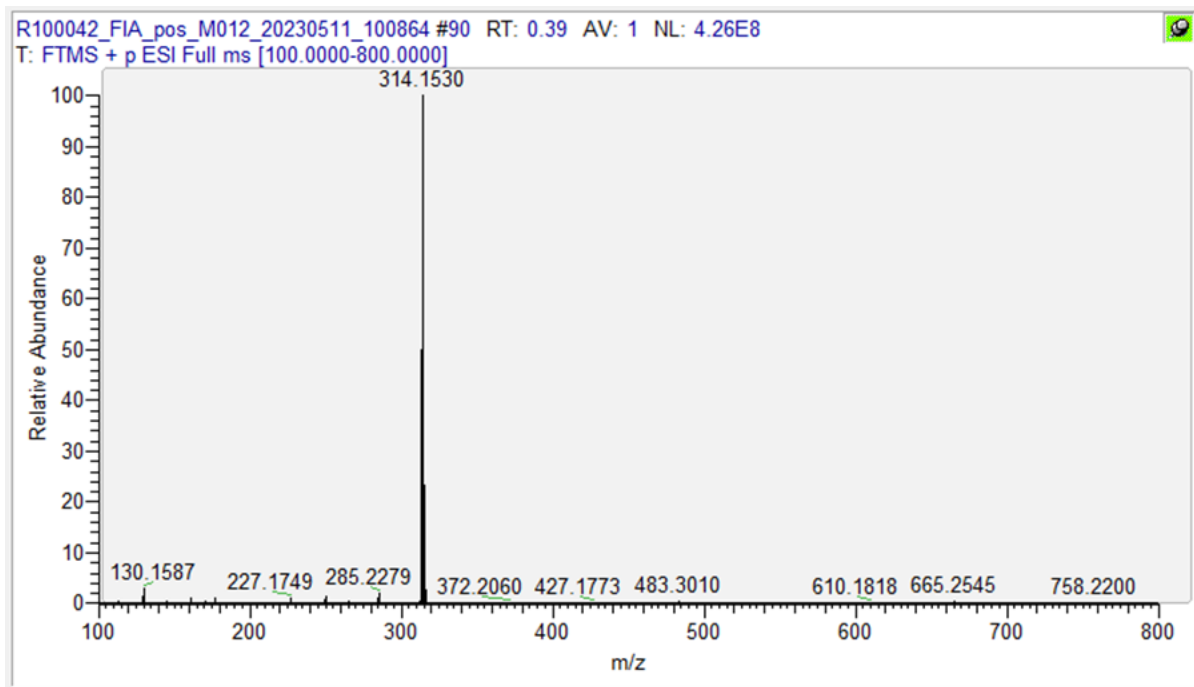

**Figure S35.** ESI-FTMS spectrum of compound **6**.

**Table S1.** Crystal data and structure refinement for compound **3**.

|                                                             |                                                                              |
|-------------------------------------------------------------|------------------------------------------------------------------------------|
| Empirical formula                                           | C <sub>21</sub> H <sub>16</sub> N <sub>2</sub> O <sub>3</sub>                |
| Formula weight                                              | 344.37                                                                       |
| Temperature/K                                               | 140.0(1)                                                                     |
| Crystal system                                              | orthorhombic                                                                 |
| Space group                                                 | <i>Pbca</i>                                                                  |
| <i>a</i> /Å                                                 | 14.4599(2)                                                                   |
| <i>b</i> /Å                                                 | 7.1736(2)                                                                    |
| <i>c</i> /Å                                                 | 29.6287(6)                                                                   |
| $\alpha$ /°                                                 | 90                                                                           |
| $\beta$ /°                                                  | 90                                                                           |
| $\gamma$ /°                                                 | 90                                                                           |
| Volume/Å <sup>3</sup>                                       | 3073.37(11)                                                                  |
| <i>Z</i>                                                    | 8                                                                            |
| $\rho_{\text{calc}}$ /cm <sup>3</sup>                       | 1.4884                                                                       |
| $\mu$ /mm <sup>-1</sup>                                     | 0.822                                                                        |
| <i>F</i> (000)                                              | 1440                                                                         |
| Crystal size/mm <sup>3</sup>                                | 0.14 × 0.11 × 0.02                                                           |
| Radiation                                                   | Cu K $\alpha$ ( $\lambda$ = 1.54184 Å)                                       |
| 2 $\Theta$ max. for data collection/°                       | 160                                                                          |
| Index ranges                                                | -12 ≤ <i>h</i> ≤ 18, -9 ≤ <i>k</i> ≤ 7, -37 ≤ <i>l</i> ≤ 37                  |
| Reflections collected                                       | 19757                                                                        |
| Independent reflections                                     | 3342 [ <i>R</i> <sub>int</sub> = 0.0356, <i>R</i> <sub>sigma</sub> = 0.0343] |
| Data/restraints/parameters                                  | 3342/0/251                                                                   |
| Goodness-of-fit on <i>F</i> <sup>2</sup>                    | 1.037                                                                        |
| Final <i>R</i> indexes [ <i>I</i> > 2 $\sigma$ ( <i>I</i> ) | <i>R</i> <sub>1</sub> = 0.0430, <i>wR</i> <sub>2</sub> = 0.1168              |
| Final <i>R</i> indexes [all data]                           | <i>R</i> <sub>1</sub> = 0.0492, <i>wR</i> <sub>2</sub> = 0.1216              |
| Largest diff. peak/hole / e Å <sup>-3</sup>                 | 0.28/-0.18                                                                   |

**Table S2.** Fractional Atomic Coordinates ( $\times 10^4$ ) and Equivalent Isotropic Displacement Parameters ( $\text{\AA}^2 \times 10^3$ ) for compound **3**.  $U_{\text{eq}}$  is defined as 1/3 of the trace of the orthogonalised  $U_{\text{ij}}$  tensor.

| Atom | <i>x</i>   | <i>y</i>   | <i>z</i>  | <i>U</i> (eq) |
|------|------------|------------|-----------|---------------|
| C1   | 4179.1(9)  | 8040(2)    | 4323.6(5) | 30.8(3)       |
| C2   | 3991.9(9)  | 8060(2)    | 3864.4(5) | 32.4(3)       |
| C3   | 4630.3(9)  | 7429(2)    | 3543.7(5) | 30.2(3)       |
| C4   | 6292.1(10) | 6490(2)    | 3419.5(5) | 33.7(3)       |
| C5   | 7129.4(10) | 5870(2)    | 3581.2(5) | 35.6(3)       |
| C6   | 7261.1(9)  | 5651(2)    | 4042.7(5) | 33.2(3)       |
| C7   | 6764.9(9)  | 5976(2)    | 4830.9(5) | 30.4(3)       |
| C8   | 6248.2(10) | 6666(2)    | 5604.4(5) | 32.2(3)       |
| C9   | 5589.6(10) | 7284(2)    | 5901.9(5) | 32.8(3)       |
| C10  | 4725.8(10) | 7915(2)    | 5756.5(5) | 33.4(3)       |
| C11  | 4536.4(10) | 7947(2)    | 5302.4(5) | 31.5(3)       |
| C12  | 5197.2(9)  | 7358(2)    | 4981.5(5) | 28.4(3)       |
| C13  | 6055.3(9)  | 6695(2)    | 5142.7(5) | 29.3(3)       |
| C14  | 6575.7(9)  | 6156(2)    | 4342.9(5) | 29.4(3)       |
| C15  | 5703.1(9)  | 6823(2)    | 4186.3(5) | 28.0(3)       |
| C16  | 5012.4(9)  | 7402(2)    | 4497.6(5) | 27.8(3)       |
| C17  | 5540.2(9)  | 6898(2)    | 3707.7(5) | 29.3(3)       |
| N18  | 4386.4(8)  | 7352.8(19) | 3096.6(4) | 32.9(3)       |
| C19  | 3449.6(11) | 7948(3)    | 2963.4(6) | 41.0(4)       |
| C20  | 3353.3(11) | 7324(3)    | 2476.1(5) | 41.0(4)       |
| C21  | 3918.8(10) | 5541(3)    | 2467.6(5) | 38.8(4)       |
| C22  | 4753.7(10) | 6031(2)    | 2758.7(5) | 34.3(3)       |
| O23  | 7479.7(7)  | 5252.1(17) | 4972.4(3) | 38.4(3)       |
| N24  | 5789.9(9)  | 7295(2)    | 6382.0(4) | 38.3(3)       |
| O25  | 6541.1(8)  | 6693(2)    | 6511.7(4) | 51.8(4)       |
| O26  | 5198.0(9)  | 7903(2)    | 6643.2(4) | 48.0(3)       |

**Table S3.** Anisotropic Displacement Parameters ( $\text{\AA}^2 \times 10^3$ ) for compound **3**. The Anisotropic displacement factor exponent takes the form:  $-2\pi^2[h^2a^{*2}U_{11}+2hka^*b^*U_{12}+\dots]$ .

| Atom | $U_{11}$ | $U_{22}$ | $U_{33}$ | $U_{12}$    | $U_{13}$    | $U_{23}$ |
|------|----------|----------|----------|-------------|-------------|----------|
| C1   | 27.4(6)  | 39.1(8)  | 25.9(7)  | -<br>0.0(5) | 1.1(5)      | -1.8(6)  |
| C2   | 27.0(6)  | 43.7(8)  | 26.4(7)  | 2.7(6)      | -<br>2.2(5) | -0.7(6)  |
| C3   | 29.0(6)  | 37.5(7)  | 24.1(7)  | -<br>1.7(5) | -<br>1.5(5) | 1.4(5)   |
| C4   | 30.5(7)  | 46.5(8)  | 24.0(7)  | -<br>1.3(6) | 0.4(5)      | 0.9(6)   |
| C5   | 27.9(6)  | 48.3(9)  | 30.5(7)  | 1.5(6)      | 3.6(5)      | -1.8(6)  |
| C6   | 25.3(6)  | 41.4(8)  | 32.9(7)  | -<br>0.3(6) | -<br>2.0(5) | 0.5(6)   |
| C7   | 25.6(6)  | 35.6(7)  | 29.9(7)  | -<br>3.6(5) | -<br>3.6(5) | 1.2(5)   |
| C8   | 29.9(6)  | 39.0(8)  | 27.6(7)  | -<br>5.5(6) | -<br>4.0(5) | 3.5(6)   |
| C9   | 36.0(7)  | 39.6(8)  | 22.9(7)  | -<br>7.8(6) | -<br>2.8(5) | 1.5(6)   |
| C10  | 33.5(7)  | 40.3(8)  | 26.3(7)  | -<br>4.2(6) | 2.3(5)      | -1.4(6)  |
| C11  | 28.8(6)  | 39.4(8)  | 26.4(7)  | -<br>2.4(6) | -<br>0.6(5) | -0.3(6)  |
| C12  | 27.5(6)  | 32.2(7)  | 25.4(7)  | -<br>5.2(5) | -<br>1.5(5) | 0.3(5)   |
| C13  | 28.0(6)  | 33.9(7)  | 26.0(7)  | -<br>4.6(5) | -<br>2.5(5) | 1.8(5)   |
| C14  | 26.8(6)  | 34.4(7)  | 26.9(7)  | -<br>3.5(5) | -<br>1.2(5) | 1.1(5)   |
| C15  | 26.4(6)  | 32.4(7)  | 25.3(7)  | -<br>3.4(5) | -<br>1.1(5) | 0.9(5)   |
| C16  | 27.4(6)  | 33.0(7)  | 22.9(6)  | -<br>3.6(5) | -<br>0.5(5) | 0.4(5)   |
| C17  | 27.5(6)  | 35.7(7)  | 24.8(7)  | -<br>1.8(5) | 0.2(5)      | 0.3(5)   |

|     |                          |                                                    |
|-----|--------------------------|----------------------------------------------------|
| N18 | 28.6(5) 47.3(7) 22.9(6)  | 3.2(5) <sup>-</sup><br>1.3(4) -0.6(5)              |
| C19 | 32.2(7) 62.1(11) 28.6(8) | 8.1(7) <sup>-</sup><br>6.4(6) -4.5(7)              |
| C20 | 33.5(7) 63.1(10) 26.5(7) | 2.5(7) <sup>-</sup><br>5.1(6) -0.7(7)              |
| C21 | 36.2(7) 55.0(9) 25.3(7)  | <sup>-</sup> <sup>-</sup><br>3.1(7) 1.5(6) -2.9(6) |
| C22 | 31.4(7) 48.2(9) 23.3(7)  | 0.9(6) 0.3(5) -1.1(6)                              |
| O23 | 31.0(5) 52.9(7) 31.2(5)  | 4.5(5) <sup>-</sup><br>5.8(4) 1.8(5)               |
| N24 | 39.0(6) 50.9(8) 24.9(6)  | <sup>-</sup> <sup>-</sup><br>8.9(6) 1.7(5) 2.4(5)  |
| O25 | 38.8(6) 87.2(10) 29.5(6) | <sup>-</sup> <sup>-</sup><br>5.6(6) 8.7(5) 4.9(6)  |
| O26 | 56.5(7) 62.4(8) 25.0(6)  | 1.7(6) 3.6(5) -0.5(5)                              |

**Table S4.** Bond Lengths for compound **3**.

| Atom | Atom | Length/Å   | Atom | Atom | Length/Å   |
|------|------|------------|------|------|------------|
| C1   | C2   | 1.387(2)   | C9   | N24  | 1.4517(19) |
| C1   | C16  | 1.3882(19) | C10  | C11  | 1.373(2)   |
| C2   | C3   | 1.400(2)   | C11  | C12  | 1.413(2)   |
| C3   | C17  | 1.4534(19) | C12  | C13  | 1.4120(19) |
| C3   | N18  | 1.3719(18) | C12  | C16  | 1.4588(19) |
| C4   | C5   | 1.376(2)   | C14  | C15  | 1.4270(19) |
| C4   | C17  | 1.4132(19) | C15  | C16  | 1.4216(19) |
| C5   | C6   | 1.390(2)   | C15  | C17  | 1.4385(19) |
| C6   | C14  | 1.380(2)   | N18  | C19  | 1.4741(18) |
| C7   | C13  | 1.474(2)   | N18  | C22  | 1.478(2)   |
| C7   | C14  | 1.4771(19) | C19  | C20  | 1.518(2)   |
| C7   | O23  | 1.2305(17) | C20  | C21  | 1.518(2)   |
| C8   | C9   | 1.371(2)   | C21  | C22  | 1.525(2)   |
| C8   | C13  | 1.3963(19) | N24  | O25  | 1.2306(18) |
| C9   | C10  | 1.397(2)   | N24  | O26  | 1.2333(18) |



**Table S5.** Bond Angles for compound **3**.

| Atom | Atom | Atom | Angle/°    | Atom | Atom | Atom | Angle/°    |
|------|------|------|------------|------|------|------|------------|
| C16  | C1   | C2   | 122.48(13) | C7   | C14  | C6   | 118.36(12) |
| C3   | C2   | C1   | 122.25(13) | C15  | C14  | C6   | 120.89(13) |
| C17  | C3   | C2   | 117.05(13) | C15  | C14  | C7   | 120.75(12) |
| N18  | C3   | C2   | 119.92(13) | C16  | C15  | C14  | 120.55(12) |
| N18  | C3   | C17  | 123.03(13) | C17  | C15  | C14  | 118.55(12) |
| C17  | C4   | C5   | 122.25(14) | C17  | C15  | C16  | 120.90(12) |
| C6   | C5   | C4   | 119.99(13) | C12  | C16  | C1   | 122.08(13) |
| C14  | C6   | C5   | 120.40(13) | C15  | C16  | C1   | 117.72(12) |
| C14  | C7   | C13  | 117.01(12) | C15  | C16  | C12  | 120.18(12) |
| O23  | C7   | C13  | 121.26(13) | C4   | C17  | C3   | 123.29(13) |
| O23  | C7   | C14  | 121.73(13) | C15  | C17  | C3   | 119.19(12) |
| C13  | C8   | C9   | 119.08(13) | C15  | C17  | C4   | 117.51(12) |
| C10  | C9   | C8   | 121.84(14) | C19  | N18  | C3   | 118.89(12) |
| N24  | C9   | C8   | 119.55(13) | C22  | N18  | C3   | 125.97(12) |
| N24  | C9   | C10  | 118.61(13) | C22  | N18  | C19  | 109.56(12) |
| C11  | C10  | C9   | 119.08(14) | C20  | C19  | N18  | 104.68(13) |
| C12  | C11  | C10  | 121.30(13) | C21  | C20  | C19  | 102.41(13) |
| C13  | C12  | C11  | 117.87(13) | C22  | C21  | C20  | 102.87(13) |
| C16  | C12  | C11  | 122.08(12) | C21  | C22  | N18  | 104.28(12) |
| C16  | C12  | C13  | 120.05(12) | O25  | N24  | C9   | 118.69(13) |
| C8   | C13  | C7   | 118.01(12) | O26  | N24  | C9   | 118.58(13) |
| C12  | C13  | C7   | 121.17(12) | O26  | N24  | O25  | 122.73(13) |
| C12  | C13  | C8   | 120.80(13) |      |      |      |            |

**Table S6.** Hydrogen Atom Coordinates ( $\text{\AA}\times 10^4$ ) and Isotropic Displacement Parameters ( $\text{\AA}^2\times 10^3$ ) for compound **3**.

| Atom | <i>x</i>   | <i>y</i> | <i>z</i>  | <i>U</i> (iso) |
|------|------------|----------|-----------|----------------|
| H1   | 3719.7(9)  | 8479(2)  | 4526.6(5) | 37.0(4)        |
| H2   | 3410.6(9)  | 8518(2)  | 3764.1(5) | 38.8(4)        |
| H4   | 6216.8(10) | 6648(2)  | 3103.3(5) | 40.4(4)        |
| H5   | 7617.5(10) | 5593(2)  | 3377.4(5) | 42.7(4)        |
| H6   | 7826.4(9)  | 5150(2)  | 4152.2(5) | 39.9(4)        |
| H8   | 6827.7(10) | 6223(2)  | 5711.0(5) | 38.6(4)        |
| H10  | 4275.5(10) | 8316(2)  | 5968.8(5) | 40.1(4)        |
| H11  | 3949.4(10) | 8373(2)  | 5202.1(5) | 37.9(4)        |
| H19a | 3383(12)   | 9320(30) | 2990(6)   | 35(4)          |
| H19b | 2976(15)   | 7300(30) | 3149(8)   | 52(6)          |
| H20a | 2698.8(11) | 7082(3)  | 2397.6(5) | 49.2(4)        |
| H20b | 3608.8(11) | 8265(3)  | 2265.9(5) | 49.2(4)        |
| H21a | 3567.7(10) | 4485(3)  | 2598.0(5) | 46.6(4)        |
| H21b | 4108.6(10) | 5218(3)  | 2156.2(5) | 46.6(4)        |
| H22a | 5029(11)   | 4890(30) | 2912(6)   | 34(4)          |
| H22b | 5253(12)   | 6630(30) | 2569(6)   | 36(5)          |

**Table S7.** Crystal data and structure refinement for compound **5**.

|                                               |                                                                   |
|-----------------------------------------------|-------------------------------------------------------------------|
| Empirical formula                             | 2(C <sub>22</sub> H <sub>18</sub> N <sub>2</sub> O <sub>3</sub> ) |
| Formula weight                                | 716.80                                                            |
| Temperature/K                                 | 150.0(1)                                                          |
| Crystal system                                | triclinic                                                         |
| Space group                                   | $P \bar{1}$                                                       |
| $a/\text{\AA}$                                | 9.05934(12)                                                       |
| $b/\text{\AA}$                                | 12.12641(15)                                                      |
| $c/\text{\AA}$                                | 15.8953(2)                                                        |
| $\alpha/^\circ$                               | 87.8669(10)                                                       |
| $\beta/^\circ$                                | 76.5700(11)                                                       |
| $\gamma/^\circ$                               | 86.6510(10)                                                       |
| Volume/ $\text{\AA}^3$                        | 1695.05(4)                                                        |
| $Z$                                           | 2                                                                 |
| $\rho_{\text{calc}}/\text{cm}^3$              | 1.4043                                                            |
| $\mu/\text{mm}^{-1}$                          | 0.766                                                             |
| $F(000)$                                      | 752                                                               |
| Crystal size/ $\text{mm}^3$                   | $0.13 \times 0.04 \times 0.02$                                    |
| Radiation                                     | Cu K $\alpha$ ( $\lambda = 1.54184 \text{ \AA}$ )                 |
| $2\Theta$ range for data collection/ $^\circ$ | 160.0                                                             |
| Index ranges                                  | $-11 \leq h \leq 11, -12 \leq k \leq 15, -20 \leq l \leq 20$      |
| Reflections collected                         | 30743                                                             |
| Independent reflections                       | 7295 [ $R_{\text{int}} = 0.0367, R_{\text{sigma}} = 0.0345$ ]     |
| Data/restraints/parameters                    | 7295/0/487                                                        |
| Goodness-of-fit on $F^2$                      | 1.023                                                             |
| Final $R$ indexes [ $I > 2\sigma(I)$ ]        | $R_1 = 0.0417, wR_2 = 0.1181$                                     |
| Final $R$ indexes [all data]                  | $R_1 = 0.0475, wR_2 = 0.1233$                                     |
| Largest diff. peak/hole / $\text{e \AA}^{-3}$ | 0.21/-0.22                                                        |

**Table S8.** Fractional Atomic Coordinates ( $\times 10^4$ ) and Equivalent Isotropic Displacement Parameters ( $\text{\AA}^2 \times 10^3$ ) for compound **5**.  $U_{\text{eq}}$  is defined as 1/3 of the trace of the orthogonalised  $U_{\text{ij}}$  tensor.

| Atom | <i>x</i>   | <i>y</i>    | <i>z</i>  | <i>U</i> (eq) |
|------|------------|-------------|-----------|---------------|
| C1   | 7824.3(13) | 10603.1(9)  | 3859.6(7) | 26.9(2)       |
| C2   | 7914.7(13) | 11042.0(9)  | 3021.5(8) | 27.7(2)       |
| C3   | 7148.1(13) | 10593.5(9)  | 2469.2(7) | 25.3(2)       |
| C4   | 5209.5(13) | 9290.3(10)  | 2306.9(8) | 27.5(2)       |
| C5   | 4297.0(14) | 8428.0(10)  | 2613.2(8) | 30.6(2)       |
| C6   | 4289.0(13) | 7949.3(9)   | 3427.4(8) | 29.2(2)       |
| C7   | 5082.9(13) | 7849.6(9)   | 4806.7(8) | 26.2(2)       |
| C8   | 5880.6(13) | 7884.5(9)   | 6182.6(8) | 27.6(2)       |
| C9   | 6718.7(14) | 8311.2(10)  | 6698.8(7) | 29.0(2)       |
| C10  | 7681.4(14) | 9169.0(10)  | 6412.8(8) | 30.6(2)       |
| C11  | 7776.3(13) | 9618.7(9)   | 5593.1(8) | 28.1(2)       |
| C12  | 6922.6(12) | 9220.9(9)   | 5042.3(7) | 23.8(2)       |
| C13  | 5984.7(13) | 8336.6(9)   | 5351.8(7) | 24.9(2)       |
| C14  | 5172.3(12) | 8349.5(9)   | 3935.4(7) | 24.7(2)       |
| C15  | 6128.4(12) | 9240.4(9)   | 3635.5(7) | 23.0(2)       |
| C16  | 6986.2(12) | 9699.7(9)   | 4173.4(7) | 23.2(2)       |
| C17  | 6174.7(12) | 9697.9(9)   | 2790.4(7) | 24.3(2)       |
| N18  | 7221.5(12) | 11007.3(8)  | 1622.5(6) | 28.2(2)       |
| C19  | 7802.0(15) | 12111.5(10) | 1414.2(8) | 33.6(3)       |
| C20  | 7379.5(16) | 12560.4(11) | 588.4(8)  | 37.9(3)       |
| C21  | 7970.2(17) | 11787.4(12) | -163.1(9) | 40.9(3)       |
| C22  | 7446.1(16) | 10624.9(12) | 88.8(8)   | 39.1(3)       |
| C23  | 7888.7(15) | 10239.1(10) | 921.3(8)  | 32.8(3)       |
| O24  | 4303.2(11) | 7058.7(7)   | 5073.0(6) | 36.0(2)       |
| N25  | 6590.4(13) | 7853.7(9)   | 7589.0(7) | 35.8(2)       |
| O26  | 5872.5(13) | 7022.6(8)   | 7789.2(6) | 44.5(2)       |

|     |            |            |            |         |
|-----|------------|------------|------------|---------|
| O27 | 7192.2(17) | 8334.1(11) | 8063.2(7)  | 59.9(3) |
| C51 | 3147.0(13) | 4774.3(9)  | 6148.0(7)  | 25.2(2) |
| C52 | 3384.0(13) | 4661.3(9)  | 6986.6(7)  | 26.4(2) |
| C53 | 2629.3(12) | 3897.5(9)  | 7578.6(7)  | 23.6(2) |
| C54 | 978.9(13)  | 2295.2(9)  | 7828.5(7)  | 25.8(2) |
| C55 | 13.8(14)   | 1616.9(9)  | 7566.7(8)  | 28.7(2) |
| C56 | -306.9(13) | 1788.0(9)  | 6754.3(8)  | 27.6(2) |
| C57 | 42.5(12)   | 2731.2(9)  | 5332.6(7)  | 25.1(2) |
| C58 | 556.7(13)  | 3692.1(10) | 3911.4(7)  | 26.5(2) |
| C59 | 1310.1(13) | 4463.1(10) | 3338.8(7)  | 27.2(2) |
| C60 | 2341.3(13) | 5138.5(10) | 3565.9(7)  | 28.2(2) |
| C61 | 2625.9(13) | 5031.3(9)  | 4378.8(7)  | 26.0(2) |
| C62 | 1881.8(12) | 4251.4(8)  | 4991.1(7)  | 21.7(2) |
| C63 | 846.0(12)  | 3582.7(9)  | 4737.9(7)  | 22.8(2) |
| C64 | 369.1(12)  | 2611.0(9)  | 6196.6(7)  | 23.1(2) |
| C65 | 1385.8(11) | 3316.3(8)  | 6447.0(7)  | 20.8(2) |
| C66 | 2155.1(12) | 4130.1(9)  | 5863.2(7)  | 21.5(2) |
| C67 | 1643.3(12) | 3177.5(9)  | 7296.4(7)  | 22.2(2) |
| N68 | 2827.7(11) | 3764.1(8)  | 8422.7(6)  | 26.6(2) |
| C69 | 4211.9(14) | 4170.8(11) | 8597.7(8)  | 32.2(3) |
| C70 | 4496.3(15) | 3618.5(12) | 9423.2(8)  | 37.5(3) |
| C71 | 3141.4(17) | 3816.9(13) | 10185.5(8) | 41.5(3) |
| C72 | 1691.0(15) | 3466.0(12) | 9968.7(8)  | 35.9(3) |
| C73 | 1488.5(14) | 4026.9(10) | 9126.8(7)  | 29.2(2) |
| O74 | -854.3(11) | 2144.9(8)  | 5108.0(6)  | 35.8(2) |
| N75 | 1016.4(12) | 4590.7(10) | 2464.2(7)  | 34.6(2) |
| O76 | 190.1(14)  | 3946.1(11) | 2259.6(7)  | 52.3(3) |
| O77 | 1614.3(13) | 5345.5(9)  | 1998.4(6)  | 44.9(2) |

**Table S9.** Anisotropic Displacement Parameters ( $\text{\AA}^2 \times 10^3$ ) for compound **5**. The Anisotropic displacement factor exponent takes the form:  $-2\pi^2[h^2a^{*2}U_{11}+2hka^*b^*U_{12}+\dots]$ .

| Atom | $U_{11}$ | $U_{22}$ | $U_{33}$ | $U_{12}$ | $U_{13}$ | $U_{23}$ |
|------|----------|----------|----------|----------|----------|----------|
| C1   | 28.4(5)  | 26.7(5)  | 26.6(6)  | -5.9(4)  | -7.6(4)  | -0.2(4)  |
| C2   | 29.8(5)  | 25.7(5)  | 28.0(6)  | -8.7(4)  | -6.1(4)  | 3.2(4)   |
| C3   | 26.3(5)  | 24.5(5)  | 24.3(5)  | -1.6(4)  | -4.4(4)  | 1.1(4)   |
| C4   | 29.0(5)  | 29.1(5)  | 24.3(5)  | -1.8(4)  | -5.3(4)  | -3.6(4)  |
| C5   | 31.9(6)  | 31.2(6)  | 30.6(6)  | -6.8(5)  | -8.8(5)  | -6.9(5)  |
| C6   | 29.9(6)  | 24.2(5)  | 32.9(6)  | -7.6(4)  | -4.3(5)  | -3.3(4)  |
| C7   | 26.7(5)  | 20.2(5)  | 29.5(6)  | -3.2(4)  | -1.3(4)  | -0.9(4)  |
| C8   | 30.3(6)  | 22.2(5)  | 26.6(6)  | 1.0(4)   | 0.1(4)   | 0.6(4)   |
| C9   | 34.5(6)  | 27.3(5)  | 22.4(5)  | 3.7(4)   | -2.5(4)  | 1.0(4)   |
| C10  | 35.0(6)  | 29.4(6)  | 28.2(6)  | 0.3(5)   | -9.5(5)  | -2.0(4)  |
| C11  | 30.5(5)  | 26.7(5)  | 27.2(6)  | -4.5(4)  | -5.9(4)  | -0.2(4)  |
| C12  | 24.0(5)  | 21.5(5)  | 24.1(5)  | -0.1(4)  | -2.0(4)  | -1.8(4)  |
| C13  | 26.1(5)  | 21.0(5)  | 24.9(5)  | 1.0(4)   | -0.6(4)  | -1.7(4)  |
| C14  | 25.4(5)  | 20.2(5)  | 26.9(5)  | -2.0(4)  | -2.4(4)  | -3.4(4)  |
| C15  | 22.8(5)  | 20.8(5)  | 24.4(5)  | -1.0(4)  | -3.1(4)  | -2.6(4)  |
| C16  | 23.2(5)  | 21.5(5)  | 23.9(5)  | -1.3(4)  | -3.4(4)  | -2.0(4)  |
| C17  | 24.9(5)  | 23.3(5)  | 24.3(5)  | -0.5(4)  | -4.4(4)  | -2.9(4)  |
| N18  | 32.4(5)  | 27.6(5)  | 23.9(5)  | -4.3(4)  | -5.2(4)  | 2.6(4)   |
| C19  | 39.4(6)  | 31.0(6)  | 30.9(6)  | -8.1(5)  | -8.8(5)  | 6.7(5)   |
| C20  | 44.6(7)  | 36.5(6)  | 31.1(6)  | -3.6(5)  | -7.4(5)  | 10.1(5)  |
| C21  | 42.8(7)  | 50.2(8)  | 26.5(6)  | -0.6(6)  | -3.8(5)  | 8.8(5)   |
| C22  | 44.1(7)  | 46.8(7)  | 24.8(6)  | 0.5(6)   | -5.3(5)  | -1.1(5)  |
| C23  | 35.7(6)  | 34.0(6)  | 26.4(6)  | 0.7(5)   | -3.4(5)  | 0.2(5)   |
| O24  | 42.2(5)  | 28.3(4)  | 37.1(5)  | -14.9(4) | -6.3(4)  | 4.9(4)   |
| N25  | 42.5(6)  | 31.4(5)  | 30.8(5)  | 2.6(4)   | -4.5(4)  | 1.3(4)   |
| O26  | 56.9(6)  | 40.1(5)  | 31.6(5)  | -4.5(5)  | -1.5(4)  | 9.0(4)   |

|     |         |         |         |          |          |         |
|-----|---------|---------|---------|----------|----------|---------|
| O27 | 90.7(9) | 61.5(7) | 35.4(6) | -18.7(6) | -28.5(6) | 10.4(5) |
| C51 | 27.0(5) | 25.0(5) | 24.4(5) | -7.1(4)  | -6.7(4)  | 3.5(4)  |
| C52 | 28.1(5) | 28.1(5) | 25.4(5) | -7.9(4)  | -9.8(4)  | 1.4(4)  |
| C53 | 23.5(5) | 26.7(5) | 20.9(5) | -1.1(4)  | -6.0(4)  | 0.2(4)  |
| C54 | 27.9(5) | 26.4(5) | 21.9(5) | -1.5(4)  | -3.4(4)  | 2.1(4)  |
| C55 | 31.5(6) | 24.7(5) | 27.5(6) | -7.1(4)  | -1.5(4)  | 3.3(4)  |
| C56 | 26.9(5) | 25.9(5) | 29.8(6) | -8.2(4)  | -4.3(4)  | -1.3(4) |
| C57 | 23.9(5) | 24.8(5) | 27.4(5) | -3.2(4)  | -6.2(4)  | -4.5(4) |
| C58 | 25.6(5) | 29.3(5) | 25.5(5) | 1.5(4)   | -7.9(4)  | -5.2(4) |
| C59 | 29.1(5) | 32.4(6) | 20.1(5) | 5.6(4)   | -7.1(4)  | -2.8(4) |
| C60 | 29.8(5) | 29.7(5) | 23.3(5) | -1.3(4)  | -3.4(4)  | 2.8(4)  |
| C61 | 27.2(5) | 27.6(5) | 23.4(5) | -4.3(4)  | -6.0(4)  | 1.1(4)  |
| C62 | 21.2(5) | 22.1(5) | 21.2(5) | 0.8(4)   | -4.0(4)  | -1.4(4) |
| C63 | 22.2(5) | 23.7(5) | 22.7(5) | 1.2(4)   | -5.5(4)  | -3.5(4) |
| C64 | 22.3(5) | 22.4(5) | 24.4(5) | -2.3(4)  | -4.2(4)  | -2.1(4) |
| C65 | 19.9(5) | 20.1(5) | 21.9(5) | -0.9(4)  | -3.6(4)  | -1.5(4) |
| C66 | 21.7(5) | 21.4(5) | 21.5(5) | -1.0(4)  | -5.4(4)  | -0.3(4) |
| C67 | 21.6(5) | 22.1(5) | 22.1(5) | -0.8(4)  | -3.6(4)  | 0.1(4)  |
| N68 | 26.1(5) | 35.0(5) | 20.0(4) | -4.8(4)  | -7.4(4)  | 0.8(4)  |
| C69 | 30.6(6) | 41.8(6) | 27.1(6) | -8.7(5)  | -11.9(5) | 3.4(5)  |
| C70 | 37.5(6) | 48.9(7) | 31.1(6) | -7.8(5)  | -17.7(5) | 5.7(5)  |
| C71 | 50.7(8) | 53.4(8) | 24.6(6) | -9.8(6)  | -16.3(6) | 3.7(5)  |
| C72 | 40.2(7) | 45.1(7) | 22.2(6) | -6.3(5)  | -5.9(5)  | 1.3(5)  |
| C73 | 31.0(6) | 33.3(6) | 23.0(5) | -1.8(4)  | -5.7(4)  | -1.1(4) |
| O74 | 39.0(5) | 38.8(5) | 34.4(5) | -16.8(4) | -14.6(4) | -1.0(4) |
| N75 | 34.9(5) | 42.7(6) | 25.8(5) | 6.1(4)   | -7.9(4)  | -2.2(4) |
| O76 | 60.9(7) | 70.1(7) | 32.9(5) | -10.6(6) | -23.1(5) | -3.5(5) |
| O77 | 55.0(6) | 53.0(6) | 26.1(5) | 2.7(5)   | -10.4(4) | 7.1(4)  |

**Table S10.** Bond Lengths for compound **5**.

| Atom | Atom | Length/Å   | Atom | Atom | Length/Å   |
|------|------|------------|------|------|------------|
| C1   | C2   | 1.4023(16) | C51  | C52  | 1.3991(15) |
| C1   | C16  | 1.3805(15) | C51  | C66  | 1.3857(15) |
| C2   | C3   | 1.3826(16) | C52  | C53  | 1.3860(15) |
| C3   | C17  | 1.4420(15) | C53  | C67  | 1.4379(15) |
| C3   | N18  | 1.4070(14) | C53  | N68  | 1.3969(14) |
| C4   | C5   | 1.3748(17) | C54  | C55  | 1.3757(17) |
| C4   | C17  | 1.4109(16) | C54  | C67  | 1.4120(15) |
| C5   | C6   | 1.3972(17) | C55  | C56  | 1.3936(17) |
| C6   | C14  | 1.3793(17) | C56  | C64  | 1.3820(16) |
| C7   | C13  | 1.4801(17) | C57  | C63  | 1.4783(16) |
| C7   | C14  | 1.4775(16) | C57  | C64  | 1.4709(16) |
| C7   | O24  | 1.2280(14) | C57  | O74  | 1.2305(14) |
| C8   | C9   | 1.3726(18) | C58  | C59  | 1.3751(17) |
| C8   | C13  | 1.3956(16) | C58  | C63  | 1.3983(15) |
| C9   | C10  | 1.3914(18) | C59  | C60  | 1.3936(17) |
| C9   | N25  | 1.4819(15) | C59  | N75  | 1.4759(15) |
| C10  | C11  | 1.3795(17) | C60  | C61  | 1.3752(16) |
| C11  | C12  | 1.4095(16) | C61  | C62  | 1.4132(15) |
| C12  | C13  | 1.4096(15) | C62  | C63  | 1.4102(15) |
| C12  | C16  | 1.4680(15) | C62  | C66  | 1.4645(15) |
| C14  | C15  | 1.4227(15) | C64  | C65  | 1.4234(15) |
| C15  | C16  | 1.4282(15) | C65  | C66  | 1.4256(15) |
| C15  | C17  | 1.4266(15) | C65  | C67  | 1.4251(15) |
| N18  | C19  | 1.4654(15) | N68  | C69  | 1.4621(15) |
| N18  | C23  | 1.4745(15) | N68  | C73  | 1.4754(15) |
| C19  | C20  | 1.5237(17) | C69  | C70  | 1.5192(16) |



|     |     |            |     |     |            |
|-----|-----|------------|-----|-----|------------|
| C20 | C21 | 1.523(2)   | C70 | C71 | 1.526(2)   |
| C21 | C22 | 1.523(2)   | C71 | C72 | 1.5208(19) |
| C22 | C23 | 1.5195(17) | C72 | C73 | 1.5228(16) |
| N25 | O26 | 1.2233(15) | N75 | O76 | 1.2156(16) |
| N25 | O27 | 1.2107(17) | N75 | O77 | 1.2250(16) |

**Table S11.** Bond Angles for compound **5**.

| Atom | Atom | Atom | Angle/°    | Atom | Atom | Atom | Angle/°    |
|------|------|------|------------|------|------|------|------------|
| C16  | C1   | C2   | 122.14(10) | C66  | C51  | C52  | 122.06(10) |
| C3   | C2   | C1   | 121.29(10) | C53  | C52  | C51  | 121.48(10) |
| C17  | C3   | C2   | 118.44(10) | C67  | C53  | C52  | 118.19(10) |
| N18  | C3   | C2   | 122.83(10) | N68  | C53  | C52  | 123.22(10) |
| N18  | C3   | C17  | 118.66(10) | N68  | C53  | C67  | 118.54(9)  |
| C17  | C4   | C5   | 121.46(11) | C67  | C54  | C55  | 121.50(10) |
| C6   | C5   | C4   | 120.03(11) | C56  | C55  | C54  | 119.73(10) |
| C14  | C6   | C5   | 120.40(10) | C64  | C56  | C55  | 120.78(10) |
| C14  | C7   | C13  | 117.26(10) | C64  | C57  | C63  | 117.29(9)  |
| O24  | C7   | C13  | 120.78(11) | O74  | C57  | C63  | 121.04(10) |
| O24  | C7   | C14  | 121.96(11) | O74  | C57  | C64  | 121.68(10) |
| C13  | C8   | C9   | 118.86(11) | C63  | C58  | C59  | 118.88(11) |
| C10  | C9   | C8   | 121.89(11) | C60  | C59  | C58  | 121.57(10) |
| N25  | C9   | C8   | 119.29(11) | N75  | C59  | C58  | 119.59(11) |
| N25  | C9   | C10  | 118.82(11) | N75  | C59  | C60  | 118.84(11) |
| C11  | C10  | C9   | 119.14(11) | C61  | C60  | C59  | 119.56(11) |
| C12  | C11  | C10  | 121.17(11) | C62  | C61  | C60  | 121.08(10) |
| C13  | C12  | C11  | 117.79(10) | C63  | C62  | C61  | 117.73(10) |
| C16  | C12  | C11  | 122.08(10) | C66  | C62  | C61  | 122.05(10) |

|     |     |     |            |     |     |     |            |
|-----|-----|-----|------------|-----|-----|-----|------------|
| C16 | C12 | C13 | 120.13(10) | C66 | C62 | C63 | 120.22(10) |
| C8  | C13 | C7  | 117.60(10) | C58 | C63 | C57 | 117.62(10) |
| C12 | C13 | C7  | 121.27(10) | C62 | C63 | C57 | 121.20(10) |
| C12 | C13 | C8  | 121.12(11) | C62 | C63 | C58 | 121.17(10) |
| C7  | C14 | C6  | 118.67(10) | C57 | C64 | C56 | 118.80(10) |
| C15 | C14 | C6  | 120.82(11) | C65 | C64 | C56 | 120.65(10) |
| C15 | C14 | C7  | 120.51(10) | C65 | C64 | C57 | 120.54(10) |
| C16 | C15 | C14 | 121.28(10) | C66 | C65 | C64 | 121.35(10) |
| C17 | C15 | C14 | 118.49(10) | C67 | C65 | C64 | 118.31(10) |
| C17 | C15 | C16 | 120.20(10) | C67 | C65 | C66 | 120.34(9)  |
| C12 | C16 | C1  | 122.23(10) | C62 | C66 | C51 | 122.55(10) |
| C15 | C16 | C1  | 118.26(10) | C65 | C66 | C51 | 118.09(10) |
| C15 | C16 | C12 | 119.50(10) | C65 | C66 | C62 | 119.36(9)  |
| C4  | C17 | C3  | 121.80(10) | C54 | C67 | C53 | 121.37(10) |
| C15 | C17 | C3  | 119.46(10) | C65 | C67 | C53 | 119.71(9)  |
| C15 | C17 | C4  | 118.69(10) | C65 | C67 | C54 | 118.85(10) |
| C19 | N18 | C3  | 116.82(10) | C69 | N68 | C53 | 117.32(9)  |
| C23 | N18 | C3  | 115.91(9)  | C73 | N68 | C53 | 116.66(9)  |
| C23 | N18 | C19 | 110.84(10) | C73 | N68 | C69 | 111.57(9)  |
| C20 | C19 | N18 | 109.51(10) | C70 | C69 | N68 | 109.25(10) |
| C21 | C20 | C19 | 111.64(11) | C71 | C70 | C69 | 111.35(11) |
| C22 | C21 | C20 | 110.19(11) | C72 | C71 | C70 | 110.46(11) |
| C23 | C22 | C21 | 110.06(11) | C73 | C72 | C71 | 110.22(11) |
| C22 | C23 | N18 | 110.36(10) | C72 | C73 | N68 | 109.99(10) |
| O26 | N25 | C9  | 117.28(11) | O76 | N75 | C59 | 117.77(11) |
| O27 | N25 | C9  | 117.64(11) | O77 | N75 | C59 | 117.58(11) |
| O27 | N25 | O26 | 125.07(12) | O77 | N75 | O76 | 124.65(11) |

**Table S12.** Hydrogen Atom Coordinates ( $\text{\AA}\times 10^4$ ) and Isotropic Displacement Parameters ( $\text{\AA}^2\times 10^3$ ) for compound **5**.

| Atom | <i>x</i>   | <i>y</i>    | <i>z</i>  | <i>U</i> (iso) |
|------|------------|-------------|-----------|----------------|
| H1   | 8357.2(13) | 10938.3(9)  | 4223.3(7) | 32.2(3)        |
| H2   | 8514.3(13) | 11659.5(9)  | 2829.5(8) | 33.3(3)        |
| H4   | 5189.7(13) | 9619.0(10)  | 1757.4(8) | 33.0(3)        |
| H5   | 3671.5(14) | 8157.4(10)  | 2271.1(8) | 36.8(3)        |
| H6   | 3671.4(13) | 7344.6(9)   | 3632.4(8) | 35.0(3)        |
| H8   | 5240.7(13) | 7291.6(9)   | 6387.4(8) | 33.1(3)        |
| H10  | 8265.8(14) | 9441.6(10)  | 6777.4(8) | 36.7(3)        |
| H11  | 8428.6(13) | 10206.8(9)  | 5396.3(8) | 33.7(3)        |
| H19a | 7360.6(15) | 12611.8(10) | 1896.8(8) | 40.3(3)        |
| H19b | 8920.5(15) | 12072.7(10) | 1333.8(8) | 40.3(3)        |
| H20a | 6260.0(16) | 12659.1(11) | 690.2(8)  | 45.4(3)        |
| H20b | 7809.8(16) | 13292.9(11) | 436.4(8)  | 45.4(3)        |
| H21a | 7589.0(17) | 12062.5(12) | -671.6(9) | 49.0(4)        |
| H21b | 9094.4(17) | 11771.8(12) | -323.4(9) | 49.0(4)        |
| H22a | 6329.3(16) | 10621.0(12) | 170.3(8)  | 46.9(4)        |
| H22b | 7919.2(16) | 10112.8(12) | -380.2(8) | 46.9(4)        |
| H23a | 9009.3(15) | 10199.5(10) | 828.6(8)  | 39.3(3)        |
| H23b | 7524.9(15) | 9490.0(10)  | 1087.5(8) | 39.3(3)        |
| H51  | 3682.8(13) | 5309.6(9)   | 5761.8(7) | 30.2(3)        |
| H52  | 4077.9(13) | 5118.4(9)   | 7154.0(7) | 31.7(3)        |
| H54  | 1203.4(13) | 2167.0(9)   | 8379.8(7) | 31.0(3)        |
| H55  | -432.3(14) | 1034.3(9)   | 7938.1(8) | 34.4(3)        |
| H56  | -998.3(13) | 1333.5(9)   | 6581.8(8) | 33.1(3)        |
| H58  | -148.5(13) | 3241.4(10)  | 3748.2(7) | 31.8(3)        |
| H60  | 2844.5(13) | 5669.6(10)  | 3161.8(7) | 33.8(3)        |
| H61  | 3334.3(13) | 5489.0(9)   | 4531.3(7) | 31.2(3)        |

|      |            |            |            |         |
|------|------------|------------|------------|---------|
| H69a | 5085.3(14) | 4002.3(11) | 8108.3(8)  | 38.6(3) |
| H69b | 4099.4(14) | 4982.2(11) | 8662.8(8)  | 38.6(3) |
| H70a | 4690.5(15) | 2814.1(12) | 9337.0(8)  | 45.0(3) |
| H70b | 5411.7(15) | 3913.7(12) | 9554.6(8)  | 45.0(3) |
| H71a | 3317.2(17) | 3390.9(13) | 10699.8(8) | 49.8(4) |
| H71b | 3032.6(17) | 4610.6(13) | 10325.5(8) | 49.8(4) |
| H72a | 1740.1(15) | 2653.8(12) | 9910.9(8)  | 43.1(3) |
| H72b | 808.2(15)  | 3669.7(12) | 10443.3(8) | 43.1(3) |
| H73a | 1358.5(14) | 4836.8(10) | 9198.7(7)  | 35.0(3) |
| H73b | 565.0(14)  | 3770.3(10) | 8978.4(7)  | 35.0(3) |

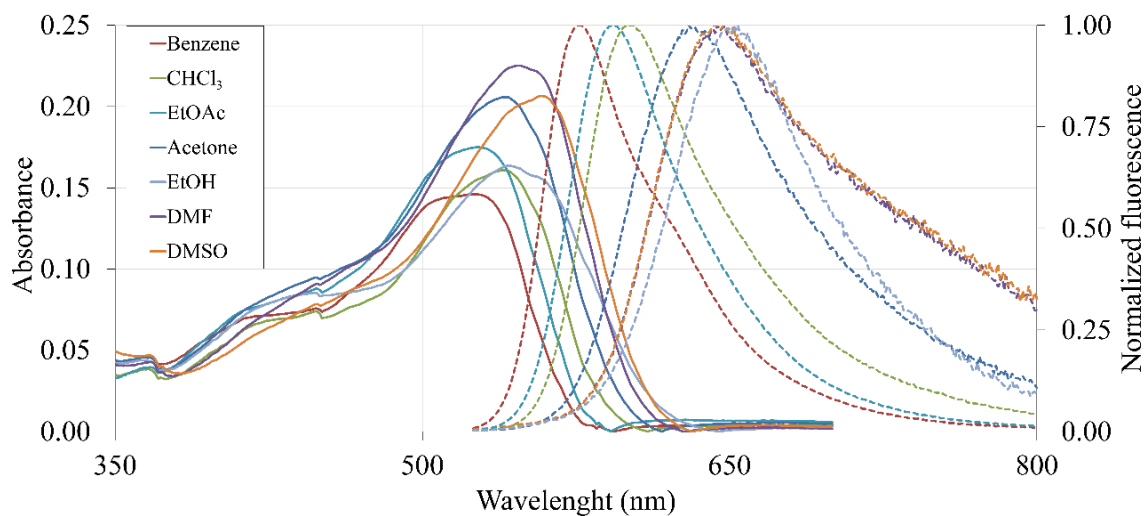

**Figure S36.** The absorption and emission spectra of compound **3** in various organic solvents.

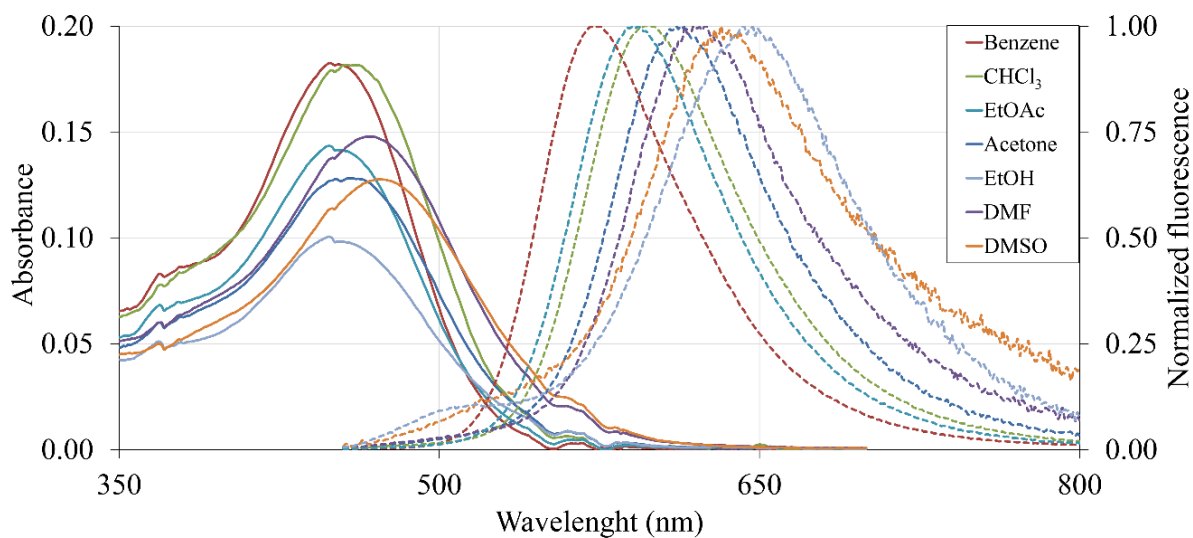

**Figure S37.** The absorption and emission spectra of compound **4** in various organic solvents.

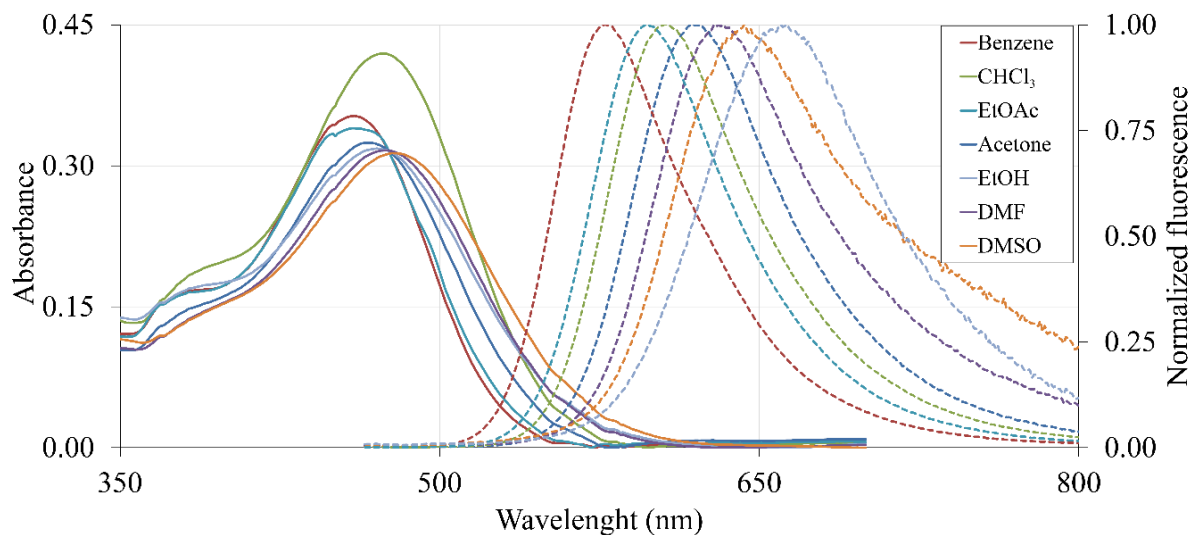

**Figure S38.** The absorption and emission spectra of compound **5** in various organic solvents.
